1 **Title: The Notch Ligand Jagged1 is Required for the Formation, Maintenance, and**  
2 **Survival of Hensen Cells in the Mouse Cochlea.**

3

4 Elena Chrysostomou<sup>1, \*</sup>, Luyi Zhou<sup>2, \*</sup>, Yuanzhao L. Darcy<sup>2</sup>, Kaley A. Graves<sup>2</sup>, Angelika  
5 Doetzlhofer<sup>1, \$</sup>, and Brandon C. Cox<sup>2,3, \$</sup>

6

7 1. The Solomon H. Snyder Department of Neuroscience and Center for Sensory

8 Biology, Johns Hopkins University School of Medicine, Baltimore, Maryland, 21205

9 2. Departments of Pharmacology and 3. Otolaryngology, Southern Illinois University

10 School of Medicine, Springfield, Illinois, 62702

11 \* Denotes co-first authors, \$ denotes co-corresponding authors

12

13 Corresponding authors email addresses:

14 Angelika Doetzlhofer: [adoetzlhofer@jhmi.edu](mailto:adoetzlhofer@jhmi.edu)

15 Brandon C. Cox: [bcox@siumed.edu](mailto:bcox@siumed.edu)

16

17

18

19

20

21

## 22 **ABSTRACT**

23 During cochlear development, the Notch ligand JAGGED 1 (JAG1) plays an important  
24 role in the specification of the prosensory region, which gives rise to sound-sensing hair  
25 cells and neighboring supporting cells (SCs). While JAG1's expression is maintained in  
26 SCs through adulthood, the function of JAG1 in SC development is unknown. Here, we  
27 demonstrate that JAG1 is essential for the formation and maintenance of Hensen cells  
28 (HeCs), a highly specialized SC-subtype located at the edge of the auditory epithelium.  
29 Deletion of *Jag1* at the onset of differentiation, at stage E14.5, disrupted HeC formation.  
30 Similar loss of HeCs was observed when *Jag1* was deleted at P0/P1 and fate-mapping  
31 analysis revealed that in the absence of *Jag1* some HeCs die, but others convert into  
32 neighboring Claudius cells. In support of a role for JAG1 in cell survival, genes involved  
33 in mitochondrial function and protein synthesis were downregulated in P0 cochlea lacking  
34 *Jag1*.

35

## 36 **INTRODUCTION**

37 The canonical Notch signaling cascade plays multiple roles in the development of  
38 sensory structures in the vertebrate inner ear. In this pathway, activation of the Notch  
39 receptor by membrane-bound ligands located on neighboring cells leads to the release  
40 of the Notch intercellular domain, which as part of a larger transcription complex, activates  
41 the transcription downstream target genes (Kopan and Ilagan, 2009).

42 During inner ear sensory development, Notch signaling operates through two  
43 distinct modes of signaling, lateral inhibition and lateral induction (Eddison et al., 2000,  
44 Daudet and Zak, 2020). Notch-mediated lateral induction first defines and maintains the

45 prosensory domains that give rise to highly specialized sensory epithelia composed of  
46 hair cells (HCs) and surrounding supporting cells (SCs). The Notch ligand JAGGED1  
47 (JAG1) and the downstream transcription factor SOX2 are essential for the early role of  
48 Notch signaling in prosensory progenitor specification and maintenance (Daudet and  
49 Lewis, 2005, Hartman et al., 2010, Pan et al., 2010, Neves et al., 2011) and early loss of  
50 JAG1 abolishes or greatly reduces the pool of inner ear prosensory progenitors (Brooker  
51 et al., 2006, Kiernan et al., 2006, Petrovic et al., 2014).

52 As prosensory progenitor cells differentiate into HCs and SCs during late  
53 embryogenesis, Notch signaling plays a key role in limiting the number of HCs that form  
54 in a process termed lateral inhibition. Activated by ATOH1, a transcriptional activator and  
55 master regulator of HC formation (Bermingham et al., 1999, Chen et al., 2002, Woods et  
56 al., 2004), nascent HCs express the Notch ligands *Delta-like 1 (Dll1)*, *Delta-like 3 (Dll3)*,  
57 and *Jagged 2 (Jag2)* (Adam et al., 1998, Lanford et al., 1999, Morrison et al., 1999,  
58 Hartman et al., 2007). Activation of Notch 1 receptor signaling by DLL1 and JAG2 in  
59 adjacent prosensory progenitor cells inhibits these cells from becoming HCs (Lanford et  
60 al., 1999, Kiernan et al., 2005, Brooker et al., 2006).

61 Important effectors of this HC-repressive function mediated by Notch signaling are  
62 members of the HES/HEY family. HES/HEY proteins are transcriptional repressors, which  
63 antagonize HC formation by repressing *Atoh1* expression and ATOH1 activity (Zine et al.,  
64 2001, Zheng and Gao, 2000, Li et al., 2008, Doetzlhofer et al., 2009, Tateya et al., 2011).

65 We recently uncovered that canonical Notch signaling, in addition to its role in HC  
66 fate repression, is required for the differentiation and survival of cochlear SCs (Campbell  
67 et al., 2016). However, the Notch ligand(s) and receptor(s) involved in this process are

68 unknown. A potential candidate for instructing SC development is the Notch ligand JAG1.  
69 JAG1, which initially is expressed by cochlear and vestibular prosensory progenitors,  
70 continues to be highly expressed in SCs (Morrison et al., 1999). While other Notch ligands  
71 are down-regulated during the first postnatal week, coinciding with the early phase of  
72 cochlear HC and SC maturation, SC-specific JAG1 expression continues throughout  
73 adulthood where its function is unknown (Maass et al., 2015, Murata et al., 2006, Hartman  
74 et al., 2007, Oesterle et al., 2008).

75 In the present study, we investigated the role of JAG1 in differentiating and  
76 maturing SCs. Our analysis revealed that deletion of *Jag1* at the onset of cochlear  
77 differentiation, alters the patterning and cellular morphology of SCs and leads to a down-  
78 regulation of genes involved in mitochondrial function and protein synthesis within the  
79 sensory epithelium. Furthermore, using morphological analyses and fate-mapping, we  
80 show that *Jag1* deletion prior to and after cochlear differentiation resulted in loss of a  
81 specialized SC subtype called Hensen cells (HeCs). Functional analysis of adult *Jag1*  
82 mutant animals in which *Jag1* was deleted at the perinatal stage revealed mild hearing  
83 deficits at low frequencies. Together, our results suggest that *Jag1*-mediated Notch  
84 signaling in cochlear SCs is critical for the formation, maintenance, and survival of HeCs.

85

## 86 RESULTS

87 The mammalian auditory sensory epithelium houses several distinct SC subtypes  
88 including HeCs, Deiters' cells (DCs), inner and outer pillar cells (IPCs, OPCs), inner  
89 phalangeal cells (IPhCs), and border cells (BCs) (Fig. 1A). To investigate the function of  
90 JAG1 in differentiating SCs, we made use of *Jag1<sup>loxP/loxP</sup>* (*Jag1<sup>fx/fx</sup>*) mice, previously

91 established by Dr. Julian Lewis's group (Brooker et al., 2006) and *Sox2<sup>CreERT2/+</sup>* mice  
92 (Arnold et al., 2011). In the cochlea, *Sox2<sup>CreERT2/+</sup>* is highly expressed in HC and SC  
93 precursors and by one week of age its expression becomes restricted to terminal  
94 differentiated SCs (Walters et al., 2015, Gu et al., 2016). We timed-mated  
95 *Sox2<sup>CreERT2/+</sup>::Jag1<sup>fx/fx</sup>* with *Jag1<sup>fx/fx</sup>* mice and administered tamoxifen to pregnant dams  
96 at stage embryonic day (E) 14.5 (Fig. 1B), which bypasses the earlier requirement for  
97 JAG1 in cochlear prosensory progenitor specification and maintenance (Brooker et al.,  
98 2006, Kiernan et al., 2006, Hao et al., 2012, Campbell et al., 2016). To control for *Sox2*  
99 haploinsufficiency, we also collected animals that did not receive tamoxifen treatment  
100 (untreated). We harvested control (*Jag1<sup>fx/fx</sup>* treated, *Jag1<sup>fx/fx</sup>* untreated, and  
101 *Sox2<sup>CreERT2/+</sup>::Jag1<sup>fx/fx</sup>* untreated) and *Sox2<sup>CreERT2/+</sup>::Jag1<sup>fx/fx</sup>* treated [*Jag1* conditional  
102 knockout (CKO)] embryos at E18.5/postnatal day (P) 0.

103 First, we analyzed JAG1 expression in control and *Jag1* CKO cochlear tissue to  
104 validate Cre-mediated deletion of *Jag1*. In control samples, JAG1 protein was localized  
105 at the surface of SCs, except for HeCs (Fig. 1C). By contrast, the majority of SCs in *Jag1*  
106 CKO animals lacked JAG1 protein expression (Fig. 1D). Next, we analyzed whether *Jag1*  
107 deletion disrupted the formation or patterning of SCs and/or HCs. To label HCs, we used  
108 immuno-staining against myosin VIIa, which labels both inner HCs (IHCs) and outer HCs  
109 (OHCs) (Hasson et al., 1995). To visualize SCs, we immuno-stained against SOX2, which  
110 at E18.5/P0 is highly expressed in the nucleus of all SC subtypes, including HeCs, and is  
111 expressed at a lower level in the nucleus of IHCs and OHCs (Kempfle et al., 2016). We  
112 found that *Jag1* deletion had no effect on the number (density) of IHCs or OHCs (Fig. 1E,  
113 F, I). Our analysis of the SC phenotype, however revealed a significant reduction in the

114 number of HeCs in *Jag1* CKO mice compared to all three controls (Fig. 1E-I). In cochlear  
115 tissue of control animals, SOX2<sup>+</sup> HeCs were located between the 3<sup>rd</sup> row of DCs and  
116 Claudius cells (CCs), with their nuclei residing in both the HC and SC layers, and with 2-  
117 3 HeCs sitting on top of each other (Fig. 1A, E, G). By contrast, *Jag1* CKO cochlear tissue  
118 contained either no or only a few scattered HeCs within the HC and SC layers (Fig. 1F,  
119 H).

120 In addition, DCs in *Jag1* CKO mice had enlarged nuclei compared to control mice,  
121 and their arrangement appeared to be disorganized, suggesting defects in DC  
122 differentiation (Fig. 1G, H). Decreased numbers of DCs in the 2<sup>nd</sup> and 3<sup>rd</sup> row (DC2 and  
123 DC3) was observed in *Jag1* CKO samples compared to the *Jag1<sup>fx/fx</sup>* treated and/or  
124 *Jag1<sup>fx/fx</sup>* untreated control groups, but not when compared to *Sox2<sup>CreERT2/+::Jag1<sup>fx/fx</sup></sup>*  
125 untreated controls (Fig. 1I). A similar result was observed for IPCs and OPCs (Fig. 1I),  
126 suggesting that *Jag1* deficiency combined with *Sox2* haploinsufficiency negatively affects  
127 the differentiation of DCs and PCs. Unfortunately, we were unable to address how *Jag1*  
128 deficiency combined with *Sox2* haploinsufficiency may impact DC and PC maturation as  
129 conditional deletion of *Jag1* at E14.5 resulted in early postnatal lethality. In summary, our  
130 analysis demonstrates that JAG1's function is essential for the formation of HeCs in the  
131 mammalian cochlea.

132 To gain insight into how JAG1 may influence HeC development, we characterized  
133 JAG1-mediated gene expression changes in the developing auditory sensory epithelium  
134 using whole genome micro-arrays. We administered tamoxifen to timed pregnant dams  
135 at stage E14.5 and harvested *Jag1* CKO (*Sox2<sup>CreERT2/+::Jag1<sup>fx/fx</sup></sup>*) and control (*Jag1<sup>fx/fx</sup>*)  
136 mice at stage E18.5/P0 (Fig. 2A). We extracted RNA from enzymatically purified control

137 and *Jag1* CKO cochlear sensory epithelia, and analyzed RNA abundance using the  
138 GeneChip® Mouse Clariom D Arrays (Fig. 2A). Using a one-way ANOVA model we  
139 determined genes that were significantly up- (red) or down-regulated (blue) in control  
140 versus *Jag1* CKO cochlear epithelial cells. After removing pseudogenes, imprinted,  
141 misaligned and low expressing genes (average mean log<sub>2</sub> (control, *Jag1* CKO) <5.5), a  
142 total of 227 genes were differentially expressed between control and *Jag1* CKO samples  
143 with 55 genes being significantly up-regulated (red dots, p-value ≤0.05, log<sub>2</sub>(FC) ≥3σ)  
144 and 172 genes being down-regulated (blue dots, p-value ≤0.05, log<sub>2</sub>(FC) ≤-3σ) (Fig. 2B).  
145 To identify SC-specific genes that are regulated by JAG1-Notch signaling, we utilized  
146 published data to generate a high confidence list of 200 SC-specific genes (Maass et al.,  
147 2016, Burns et al., 2015). Our analysis revealed that 41 out of these 200 SC-specific  
148 genes (21%) were differentially regulated by JAG1-Notch signaling, with 32 being  
149 downregulated and 9 being upregulated in *Jag1* CKO samples compared to control (Fig.  
150 2 C) (Supplemental Table 1, 2 genes marked \$). Furthermore, the list of down-regulated  
151 genes included SC-specific genes previously reported to be positively regulated by Notch  
152 signaling (*Agr3*, *F2rl1*, *Hey1*, *Igfbp3*, *Lrrtm1*, *Lsamp*, *Ntf3*, *Rab3b*, *Shc3* and *Trh*) (Fig. 2B)  
153 (Supplemental Table 1, genes marked #) (Maass et al., 2016, Campbell et al., 2016).  
154 Conversely, the list of up-regulated genes included a small subset of genes previously  
155 shown to be negatively regulated by Notch signaling in response to Notch inhibition  
156 (*Cdh4*, *Dpysl2*, *Robo2* and *Cpa6*) (Maass et al., 2016) (Supplemental Table 2, genes  
157 marked #). However, deletion of *Jag1* in the differentiating cochlea failed to significantly  
158 increase the expression of *Atoh1* or other early HC-specific transcription factors  
159 (Supplemental Table 2). This is consistent with our finding that *Jag1* deletion at E14.5

160 does not result in ectopic HC formation (Fig. 1F, I). To uncover the biological processes  
161 associated with JAG1-regulated genes, we performed gene ontology (GO) enrichment  
162 analysis using Database for Annotation, Visualization and Integrated Discovery (DAVID).  
163 We found that the list of down-regulated genes (p-value  $\leq 0.05$ ,  $\log_2(\text{FC}) \leq -2\sigma$ ) was  
164 enriched for terms linked to mitochondrial function (oxidative phosphorylation) and  
165 mitochondrial dysfunction (Alzheimer, Parkinson and Huntington), as well as protein  
166 synthesis (ribosome, intracellular ribonucleoprotein complex) (Fig. 2D, E).

167         Next, we used qPCR to confirm *Jag1* deletion and validate a subset of SC-  
168 specific/enriched genes found to be down-regulated in *Jag1* mutant cochlear epithelia.  
169 The genes were selected based on their specific expression in HeCs (*Trpa1*) (Corey et  
170 al., 2004), and their association with biological processes of interest including oxidative  
171 stress and cell death [*Gpx1* (Ohlemiller et al., 2000), *Apod* (Ganfornina et al., 2008),  
172 *Mgst3* (Lu et al., 2016)], mitochondrial inner membrane transport (*Timm13*) (Rothbauer  
173 et al., 2001), and prosensory progenitor cell proliferation (*Stox1*) (Nie et al., 2015). We  
174 also included in our analysis a subset of genes, that have been reported to be positively  
175 regulated by Notch signaling in SC precursors (*Hey1*, *Igfbp3*) (Campbell et al., 2016) and  
176 in SCs (*Hey1*, *Igfbp3*, *Rab3b*) (Maass et al., 2016). We found that *Jag1*, *Hey1*, *Igfbp3*,  
177 *Timm13*, *Apod*, and *Trpa1* expression were significantly reduced in *Jag1* mutant cochlear  
178 epithelia. *Gpx1*, *Mgst3*, *Rab3b* and *Stox1* expression appeared reduced, but due to  
179 variability across samples the reduction was not significant. Taken together, our gene  
180 expression analysis confirms the observed defect in HeC formation and suggests a role  
181 for JAG1 in tissue homeostasis and metabolism.



182 In mice, HCs and SCs are not functional at birth and undergo a 2-week long  
183 process of postnatal maturation (Legendre et al., 2008, Lelli et al., 2009, Szarama et al.,  
184 2012). To address whether JAG1 function is required during postnatal maturation, we  
185 deleted *Jag1* after the completion of HC and SC differentiation. To that end, we injected  
186 *Jag1* CKO mice and their *Jag1<sup>fx/fx</sup>* littermates with 4-hydroxy-tamoxifen at P0/P1. To  
187 control for *Sox2* haploinsufficiency, we also collected *Sox2<sup>CreERT2/+::Jag1<sup>fx/fx</sup></sup>* and *Jag1<sup>fx/fx</sup>*  
188 mice that did not receive 4-hydroxy-tamoxifen treatment (untreated) (Fig. 3A). Control  
189 (*Jag1<sup>fx/fx</sup>* treated, *Jag1<sup>fx/fx</sup>* untreated, and *Sox2<sup>CreERT2/+::Jag1<sup>fx/fx</sup></sup>* untreated) and *Jag1* CKO  
190 mice were harvested and analyzed at P5 or P7. JAG1 immuno-staining confirmed the  
191 successful deletion of *Jag1* in cochlear tissue obtained from *Jag1* CKO mice (Fig. 3B, C).  
192 Next, we quantified HC and SC subtypes at stage P7 in *Jag1* CKO and control mice using  
193 the HC and SC markers myosin VIIa and SOX2 respectively. Quantification of SC  
194 numbers revealed a significant reduction in the number of HeCs in *Jag1* CKO mice  
195 compared to control mice (Fig. 3J). A recent report found that *Sox2* haploinsufficiency at  
196 the neonatal stage stimulates PC proliferation and the production of ectopic IHCs  
197 (Atkinson et al., 2018). Consistent with these recent findings, quantification of HC  
198 numbers in control and *Jag1* CKO mice uncovered a mild increase in the number of IHC  
199 in the two groups of mice that contained the *Sox2<sup>CreERT2/+</sup>* allele compared to the *Jag1<sup>fx/fx</sup>*  
200 treated and *Jag1<sup>fx/fx</sup>* untreated controls. Also we observed a mild, but significant increase  
201 in the number of IPCs in *Jag1* CKO mice compared to *Sox2<sup>CreERT2/+::Jag1<sup>fx/fx</sup></sup>* untreated  
202 control animals (Fig 3J).

203 To confirm the observed HeC loss in *Jag1* CKO mice, we conducted additional  
204 experiments, in which we used a combination of fatty acid binding protein 7 (FABP7),

205 SOX2, and CD44 immuno-staining to distinguish between HeCs, DCs, and CCs. In the  
206 postnatal cochlea, FABP7 is highly expressed in the cytoplasm of HeCs, IPhCs, and BCs  
207 (Saino-Saito et al., 2010), whereas CD44 is selectively expressed on the cell membranes  
208 of OPCs and CCs (Hertzano et al., 2010)(Fig. 3D, D'). In stage P5 control mice, 2-3 HeC  
209 nuclei (SOX2<sup>+</sup>, FABP7<sup>+</sup>) are stacked on top of each other (Fig. 3F, H), with a single row  
210 of HeCs within the SC nuclear layer and a row of stacked HeCs residing in the HC layer  
211 (Fig. 3D, D'). By contrast, the cochlea of *Jag1* CKO mice only contained a few scattered  
212 SOX2<sup>+</sup> HeC-like nuclei within the HC layer and SC layer (Fig. 3E, E'). These HeC-like  
213 cells expressed FABP7 at a much-reduced level than HeCs in control mice and some  
214 SOX2<sup>+</sup> HeC-like cells in *Jag1* CKO mice appeared to co-express CD44, suggesting that  
215 these cells may undergo a cell-fate conversion into CCs (Fig. 3E').

216 To further investigate the HeC-like nuclei with CD44 expression, we performed  
217 fate-mapping experiments using *Sox2<sup>CreERT2/+</sup>::Jag1<sup>fx/fx</sup>::Rosa26<sup>tdTomato/+</sup>* and  
218 *Sox2<sup>CreERT2/+</sup>::Rosa26<sup>tdTomato/+</sup>* controls that were injected with tamoxifen at P0/P1 (Fig.  
219 4A). In control samples collected at P7, all SOX2<sup>+</sup> SC subtypes, including HeCs,  
220 expressed tdTomato (Tom, Fig. 4B, B''), and a small number of CD44<sup>+</sup> CCs also  
221 expressed Tom (Fig. 4B'). Quantification of Tom<sup>+</sup> cells lateral to the third row of DCs at  
222 P7 showed a decrease in the number of Tom<sup>+</sup> cells and Tom<sup>+</sup>, SOX2<sup>+</sup> cells in all turns of  
223 the cochlea when *Jag1* was deleted, which suggests that *Jag1* is important for the survival  
224 of some HeCs. In support of these findings, we frequently noted missing cells (Fig. 3G)  
225 as well as cellular debris (Fig. 3I) within the HeC region in *Jag1* CKO mice. However,  
226 staining with a marker of apoptosis, cleaved caspase-3, revealed no caspase3<sup>+</sup> HeCs in  
227 the cochlea of *Jag1* CKO mice between P1-P4. There was also a ~2-fold increase in the

228 number of cells labeled with both Tom and CD44 in *Jag1* CKO cochleae (Fig. 4C-F). Thus,  
229 some HeCs appear to lose SOX2 expression and convert into CCs.

230 To investigate whether *Sox2* haploinsufficiency interacted with *Jag1* deletion to  
231 produce changes in HeC numbers, we used a different CreER line to delete *Jag1* from  
232 the neonatal cochlea. *Fgfr3-iCreER<sup>T2/+</sup>* is a transgenic allele that has been used  
233 extensively in cochlear studies and there have been no reports of haploinsufficiency  
234 (Atkinson et al., 2018, Kirjavainen et al., 2015). In contrast with *Sox2<sup>CreERT2/+</sup>* mice, *Fgfr3-*  
235 *iCreER<sup>T2/+</sup>* mice injected with tamoxifen at P0/P1 have CreER expression in ~100% of  
236 PCs and DCs, as well as in varying amounts of OHCs depending on the cochlear turn  
237 (Cox et al., 2012, McGovern et al., 2017). *Fgfr3-iCreER<sup>T2/+</sup>::Jag1<sup>fx/fx</sup>* and iCre-negative  
238 control mice were injected with tamoxifen at P0 and P1 to delete *Jag1*, which was  
239 confirmed by RT-PCR showing a second smaller band that lacks exon 4 in *Fgfr3-*  
240 *iCreER<sup>T2/+</sup>::Jag1<sup>fx/fx</sup>* mice (Fig. 5A-B). We quantified HCs and individual SC subtypes at  
241 P7 using myosin VIIa to label HCs and SOX2 to label SC nuclei (Fig. 5C-F') and observed  
242 a significant loss of HeCs in *Fgfr3-iCreER<sup>T2/+</sup>::Jag1<sup>fx/fx</sup>* mice (Fig. 5I). To confirm that HeCs  
243 are missing, we employed two methods: 1) S100a1 immuno-staining to label the  
244 cytoplasm and nuclei of PCs and DCs (White et al., 2006, Buckiova and Syka, 2009) and  
245 2) FABP7 immuno-staining to label the cytoplasm of HeCs (Saino-Saito et al., 2010). In  
246 control samples, there are two rows of SOX2<sup>+</sup>, FABP7<sup>+</sup> cells located lateral to the S100a1<sup>+</sup>  
247 third row of DCs (DC3) (Fig. 5E-E', G-G'). However after *Jag1* deletion in *Fgfr3-*  
248 *iCreER<sup>T2/+</sup>::Jag1<sup>fx/fx</sup>* mice, there were no SOX2<sup>+</sup> cells located lateral to DC3 cells (Fig. 5F-  
249 F', H') and there was a reduction in FABP7 expression (Fig. 5G, H). We also performed  
250 immuno-staining with CD44, to label CCs, which are located lateral to HeCs. In *Fgfr3-*

251 *iCreER<sup>T2/+</sup>::Jag1<sup>fx/fx</sup>* mice, the CD44 expression pattern appeared similar to the control,  
252 however the CD44 staining was immediately adjacent to the SOX2<sup>+</sup> DC3 nuclei (Fig. 5G",  
253 H"). Together these results confirm that the missing SOX2<sup>+</sup> cells are HeCs. In addition,  
254 there was a slight decrease in the number of OHCs, but no changes in the number of  
255 IHCs in *Fgfr3-iCreER<sup>T2/+</sup>::Jag1<sup>fx/fx</sup>* mice at P7 (Fig. 5C-D, I), which rules out the possibility  
256 of HeCs converting into HCs. Taken together these results indicate that *Sox2*  
257 haploinsufficiency is not responsible for the loss of HeCs after *Jag1* deletion.

258 We next examined *Fgfr3-iCreER<sup>T2/+</sup>::Jag1<sup>fx/fx</sup>* mice at older ages to investigate  
259 whether SC loss progressed to other cell types. After tamoxifen treatment at P0 and P1,  
260 the number of HCs and individual SC subtypes were quantified in *Fgfr3-*  
261 *iCreER<sup>T2/+</sup>::Jag1<sup>fx/fx</sup>* cochlea and iCre-negative controls at P30 and P60 (Fig. 6A). Similar  
262 to the changes we observed at P7, there was no difference in number of IHCs or OHCs  
263 at P30 or P60 compared to the control samples (Fig. 6B-C). For SCs, the only significant  
264 difference observed at P30 and P60 was a decrease in HeCs. Thus, neonatal *Jag1*  
265 deletion induces HeC loss that occurs by P7 and does not affect other cell types or cause  
266 further morphological changes in adulthood.

267 To assess whether HeC loss affected hearing, we performed auditory brainstem  
268 response (ABR) at P30 using *Fgfr3-iCreER<sup>T2/+</sup>::Jag1<sup>fx/fx</sup>* mice and iCre-negative controls  
269 that were injected with tamoxifen at P0 and P1 (Fig. 6A). While there was a main effect  
270 of genotype, the only significant increase in ABR thresholds in *Fgfr3-iCreER<sup>T2/+</sup>::Jag1<sup>fx/fx</sup>*  
271 mice was observed at 4 kHz (Fig. 6D).

272 To investigate the function of *Jag1* at an older age when HCs and SCs are more  
273 mature, we injected *Fgfr3-iCreER<sup>T2/+</sup>::Jag1<sup>fx/fx</sup>* mice with tamoxifen at P6 and P7 and

274 quantified HCs and individual SC subtypes one week later, at P13 (Fig. 7A). Again, the  
275 numbers of IHCs and OHCs remained unchanged (Fig. 7B-D). However, unlike the  
276 neonatal *Jag1* deletion that resulted in massive HeC loss across all three cochlear turns,  
277 deletion of *Jag1* at P6/P7 induced a mild loss of HeCs that exhibited a gradient across  
278 cochlear turns. In the apical turn of *Fgfr3-iCreER<sup>T2/+</sup>::Jag1<sup>fx/fx</sup>* mouse cochleae, no HeC  
279 loss was observed (Fig. 7B). In the middle turn, there was a ~20% loss of HeCs (Fig. 7C)  
280 and in the basal turn, *Jag1* deletion at P6/P7 caused a larger ~40% loss of HeCs (Fig.  
281 7D). Thus, there appears to be a critical period for *Jag1*'s function in SCs.

282

## 283 DISCUSSION

284 JAG1 has a well-established role in specifying the prosensory region during  
285 development of the inner ear via Notch-mediated lateral induction (Eddison et al., 2000,  
286 Brooker et al., 2006, Kiernan et al., 2006, Daudet and Lewis, 2005, Hartman et al., 2010,  
287 Neves et al., 2011). However, its expression is maintained in SCs (Murata et al., 2006,  
288 Hartman et al., 2007, Oesterle et al., 2008, Maass et al., 2015) without a defined function.  
289 Here, we investigated the function of JAG1 in differentiating and maturing cochlea using  
290 two complementary *Jag1* CKO mouse models, *Sox2<sup>CreERT2/+</sup>::Jag1<sup>fx/fx</sup>* and *Fgfr3-*  
291 *iCreER<sup>T2/+</sup>::Jag1<sup>fx/fx</sup>*. We show using morphological and fate-mapping analyses that JAG1  
292 is essential for the formation of HeCs and is required for HeC survival and cell fate  
293 maintenance during the early phase of cochlear maturation. Furthermore, global gene  
294 expression analysis identifies SC-specific genes as *Jag1* targets and reveals a potential  
295 link between JAG1-Notch signaling and tissue homeostasis and metabolism. Finally,  
296 functional analysis reveals that JAG1 function in the maturing cochlea is critical for low  
297 frequency hearing.

298 Acute disruption of Notch signaling during cochlear differentiation and early  
299 maturation triggers the conversion of SC precursors and newly formed SCs into HCs  
300 (Yamamoto et al., 2006, Tang et al., 2006, Takebayashi et al., 2007, Doetzlhofer et al.,  
301 2009). Thus, it could be reasoned that HeCs are lost due to their conversion into  
302 neighboring OHCs. However, our analyses did not reveal any increase in the number of  
303 IHCs or OHCs in response to *Jag1* deletion, indicating that JAG1 is dispensable for HC  
304 fate repression and that the observed loss of HeCs was not due to their conversion into  
305 OHCs.

306 While Notch signaling is most commonly known for its roles in regulating cell fate  
307 and proliferation, recent studies showed that the developing cochlear prosensory cells  
308 and later SCs, in particular DCs, depend on Notch signaling for their survival (Yamamoto  
309 et al., 2011, Basch et al., 2011, Campbell et al., 2016). Indeed, our analysis uncovered  
310 morphological evidence of dead and dying HeCs in P6/7 *Jag1* mutant cochlear tissue and  
311 our fate-mapping experiments indicate that approximately one third of HeCs are lost due  
312 to cell death. There are several studies demonstrating that Notch signaling promotes the  
313 survival of neural stem/progenitor cells (Oishi et al., 2004, Androutsellis-Theotokis et al.,  
314 2006, Mason et al., 2006) and tumor cells (Bellavia et al., 2000, Purow et al., 2005).  
315 Mechanistic work suggests that Notch activation, through non-canonical pathway(s),  
316 activates AKT, NF- $\kappa$ B and mTOR dependent signaling cascades, increasing oxidative  
317 metabolism and the expression of pro-survival genes (Oishi et al., 2004, Chan et al., 2007,  
318 Perumalsamy et al., 2010, Hossain et al., 2018). Consistent with this link, our gene  
319 expression analysis revealed that loss of *Jag1* resulted in a broad down-regulation of  
320 genes associated with oxidative phosphorylation and protein synthesis. Future studies

321 will test the possible role of JAG1 in SC bioenergetics and explore possible links between  
322 JAG1-Notch signaling and pro-survival pathways such as AKT-mTOR signaling (Saxton  
323 and Sabatini, 2017).

324 Our fate-mapping experiments also indicate that in response to neonatal *Jag1*  
325 deletion, about two thirds of HeCs convert into CD44+, SOX2- CC-like cells. What triggers  
326 the up-regulation of CD44 and down-regulation of SOX2 in a subset of HeCs is unclear.  
327 JAG1's role in repressing a HeC-to-CC fate switch is reminiscent of its early role in  
328 vestibular prosensory cell maintenance. There, JAG1-Notch signaling prevents the  
329 conversion of prosensory progenitors into non-sensory cells through maintaining the  
330 expression of the transcription factor SOX2 and through antagonizing the transcription  
331 factor LMX1A (Mann et al., 2017, Brown et al., 2020). A similar antagonistic relationship  
332 between CC-specific determination factors and JAG1-SOX2 axis may be at play and  
333 future investigations into the molecular mechanisms of CC fate determination are  
334 warranted.

335 HeCs are a SC subtype located between the 3rd row of DCs and CCs, with no  
336 direct contact with HCs. Thus, HeCs may be uniquely vulnerable to *Jag1* deletion since  
337 they only receive Notch signals from neighboring DCs through the JAG1 ligand. By  
338 contrast the Notch receptors located on DCs and PCs are also activated by the Notch  
339 ligands DLL1 and JAG2, expressed by HCs (Lanford et al., 1999; Kiernan et al., 2005;  
340 Brooker et al., 2006). Thus *Jag1* deletion using *Sox2<sup>CreERT2/+</sup>* or *Fgfr3-iCreERT2* removes  
341 all Notch signaling from HeCs; whereas DCs and PCs would still receive Notch signaling  
342 activated by DLL1 and JAG2. However, HeCs' dependence on JAG1 appears to have a  
343 critical period as *Jag1* deletion at P6 produced a less severe phenotype where only 20-

344 40% of HeCs were lost in the middle and basal turns of the cochlea. The milder HeC  
345 phenotype at P6 may be due to a lower Cre-mediated recombination efficiency and/or an  
346 increase in JAG1 protein stability compared to P0. The later may explain why the apex,  
347 which expresses JAG1 at a 2-fold higher levels than other regions of the cochlea, shows  
348 no loss of HeCs (Son et al., 2012).

349 *Jag1* deletion at the onset of cochlear differentiation not only resulted in a loss of  
350 HeCs but caused mild patterning and laminar structure defects within the auditory sensory  
351 epithelium. A recent study proposed that HeCs are involved in the patterning of OHCs  
352 during cochlear differentiation. The authors found that HeC division and migration lateral  
353 to OHCs produces a shearing motion that facilitates the arrangement of OHCs and DCs  
354 into the final checkerboard-like pattern (Cohen et al., 2019). Thus, the mild HC and SC  
355 patterning defects we observed may be the result of missing HeCs. Alternatively, the mild  
356 defects in cellular patterning in *Jag1* mutant sensory epithelia may be due to altered cell  
357 adhesion and/or polarity properties of SCs and HCs.

358 We also observed a decrease in the number of DCs, IPCs, and OPCs when *Jag1*  
359 was deleted at E14.5 using *Sox2<sup>CreERT2/+</sup>* mice compared to controls that have normal  
360 *Sox2* expression, which suggests that loss of JAG1 combined with *Sox2*  
361 haploinsufficiency affects DC and PC differentiation. Surprisingly, deletion of *Jag1* at P0  
362 using *Sox2<sup>CreERT2/+</sup>* mice resulted in an opposite IPC phenotype, with a mild but significant  
363 increase in the number of IPCs compared to untreated *Sox2<sup>CreERT2/+</sup>::Jag1<sup>fx/fx</sup>* controls but  
364 not compared to controls that have normal *Sox2* expression. These results emphasize  
365 the need for controls of various genotypes and the use of different methods to study gene  
366 deletions since genes may interact in networks.



367 We found that *Jag1* deletion at P0 using *Fgfr3-iCreER<sup>T2</sup>* resulted in mild but  
368 significant hearing deficits at 4 kHz. The reason for the decrease in low frequency hearing  
369 sensitivity is unknown. However, it is intriguing to speculate that it is causally linked to  
370 diminished HeC function. HeCs have a role in the formation of the tectorial membrane  
371 (Rau et al., 1999, Kim et al., 2019), they participate in the recycling of potassium ions  
372 from the base of OHCs to the endolymph through gap junction connections with DCs  
373 (Sato and Santos-Sacchi, 1994, Kikuchi et al., 1995, Zwislocki et al., 1992, Lautermann  
374 et al., 1998), and they are involved in maintaining osmotic balance through their  
375 expression of aquaporin4 (Takumi et al., 1998, Li and Verkman, 2001). Moreover, a  
376 recent study provides evidence that the passive mechanical properties of HeCs may help  
377 tune the OHC force generation in the cochlear apex (Gao et al., 2014). Deregulation of  
378 any of these processes could alter hearing sensitivity, with the later altering high  
379 frequency sensitivity.

380 While HeCs were discovered over a century ago, little was known about the factors  
381 and signals that control their development. In this study, we identify the Notch ligand JAG1  
382 as being essential for HeC differentiation and maturation, revealing a novel role for JAG1  
383 in SC-fate maintenance and SC survival.

384

## 385 **MATERIALS AND METHODS**

### 386 **Animals**

387 *Sox2<sup>CreERT2/+</sup>* mice (Arnold et al., 2011) (stock #17593) and *Rosa26<sup>loxP-stop-loxP-tdTomato</sup>*  
388 (*Rosa26<sup>tdTomato</sup>*) mice (Madisen et al., 2010) (stock #7914) were purchased from The  
389 Jackson Laboratory (Bar Harbor, ME). *Fgfr3-iCreER<sup>T2</sup>* mice (Rivers et al., 2008, Young et

390 al., 2010) were provided by Dr. William Richardson (University College, London). Two  
391 different *Jag1<sup>fx/fx</sup>* mouse lines were used in this study. For *Jag1* deletion using  
392 *Sox2<sup>CreERT2/+</sup>* mice, *Jag1<sup>fx/fx</sup>* mice (Brooker et al., 2006) (MGI: 3623344) were provided by  
393 Dr. Julian Lewis (Cancer Research UK London Research Institute). In this line, loxP sites  
394 were inserted to flank exons 4 and 5, resulting in a frame shift that generates a stop codon  
395 after the start of exon 6 following Cre-mediated recombination. For *Jag1* deletion using  
396 *Fgfr3-iCreERT2/+* mice and fate-mapping with *Sox2<sup>CreERT2/+</sup>* mice, *Jag1<sup>fx/fx</sup>* mice (Kiernan et  
397 al., 2006) (MGI: 3692444) (stock# 10618) were purchased from The Jackson Laboratory  
398 (Bar Harbor, ME). In this line, loxP sites were inserted to flank exon 4, resulting in a non-  
399 functional JAG1 protein after Cre-mediated recombination. Genotyping was performed in  
400 house using PCR as previously described for each line or by Transnetyx, Inc. (Cordova,  
401 TN). Mice of both genders were used in all studies. All animal work was performed in  
402 accordance with approved animal protocols from the Institutional Animal Care and Use  
403 Committees at Johns Hopkins University or Southern Illinois University School of  
404 Medicine.

405

#### 406 **Substances given to animals**

407 *Sox2<sup>CreERT2/+</sup>::Jag1<sup>fx/fx</sup>* mice: Pregnant dams time-mated to E14.5, received two  
408 intraperitoneal (IP) injections of tamoxifen (0.125 mg/g body weight, cat #T5648, Sigma-  
409 Aldrich, St. Louis, MO) and progesterone (0.125 mg/g body weight, cat #P3972 Sigma-  
410 Aldrich, St. Louis, MO), given 8 hours apart. Neonatal pups were injected with (Z)-4-  
411 hydroxytamoxifen (0.139 mg per pup, cat #H7904-5mg, Sigma-Aldrich, St. Louis, MO) at  
412 P0 and P1. Controls included Cre-negative littermates, as well as *Sox2<sup>CreERT2/+</sup>::Jag1<sup>fx/fx</sup>*

413 and *Sox2<sup>CreERT2/+</sup>* mice that did not receive tamoxifen to control for *Sox2*  
414 haploinsufficiency. *Fgfr3-iCreERT2<sup>+/+</sup>::Jag1<sup>fx/fx</sup>* mice and *Sox2<sup>CreERT2/+</sup>::*  
415 *Jag1<sup>fx/fx</sup>::Rosa26<sup>tdTomato</sup>* mice were injected with tamoxifen (0.075mg/g body weight, cat  
416 #T5648, Sigma-Aldrich, St. Louis, MO) at P0 and P1, or at P6 and P7. Controls were  
417 iCre-negative littermates or *Sox2<sup>CreERT2/+</sup>::Rosa26<sup>tdTomato</sup>* littermates that also received  
418 tamoxifen.

419

## 420 **Tissue processing**

421 Late embryonic and early postnatal animals were staged using the EMAP eMouse Atlas  
422 Project (<http://www.emouseatlas.org>) Theiler staging criteria. Temporal bones were  
423 collected and fixed in 4% paraformaldehyde (PFA, Polysciences, Inc., Warrington, PA) in  
424 10 mM PBS for 2 hours at room temperature. Cochleae were then dissected using the  
425 whole mount method as previously described (Montgomery and Cox, 2016). For cryo-  
426 sectioning, PFA-fixed inner ears were put through a sucrose gradient (10% sucrose for  
427 30 minutes, 15% sucrose for 30 minutes, and 30% sucrose overnight), submerged in  
428 OCT (Tissue-Tek, Sakura Finetek USA, Torrance, CA) and flash frozen. Sections cut at  
429 14  $\mu$ m thickness were collected on SuperFrost Plus slides (Fisher, Hampton, NH).

430

## 431 **Immuno-staining**

432 Cochlear samples were immuno-stained following standard procedures (Montgomery  
433 and Cox, 2016). Briefly, tissue was blocked and permeabilized in 10 mM PBS containing  
434 10% Normal Horse Serum (NHS) or Normal Goat Serum (NGS) (Vector Labs,  
435 Burlingame, CA), 1% Bovine Serum Albumin (BSA) (Fisher, Hampton, NH), and 1%

436 Triton-X-100 (Sigma-Aldrich, St. Louis, MO) for 1 hour at room temperature. Then  
437 samples were incubated with primary antibodies diluted in 10 mM PBS containing NHS  
438 or NGS (5%), BSA (1%), and Triton-X-100 (0.1%) overnight at 4°C or 37°C. The following  
439 primary antibodies were used: rabbit anti-FABP7 (1:200, cat #ab32423, Abcam,  
440 Cambridge, MA), rat anti-CD44 (1:500, cat #550538, BD Pharmingen, San Jose, CA),  
441 rabbit anti-cleaved caspase3 (1:1000, cat #9661, Cell Signaling Technology, Danvers,  
442 MA), goat anti-JAG1 (1:500, cat #sc-6011, Santa Cruz Biotechnology, Dallas, TX), rabbit  
443 anti-myosin VIIa (1:200, cat #25-6790, Proteus BioSciences, Ramona, CA), mouse anti-  
444 parvalbumin (1:1000, cat #P3088, Sigma-Aldrich, St. Louis, MO), rabbit anti-S100a1  
445 (1:400, cat #ab868, Abcam, Cambridge, MA), and goat anti-SOX2 (1:400, cat #sc-17320,  
446 Santa Cruz Biotechnology, Dallas, TX). The next day, samples were incubated in  
447 corresponding Alexa Fluor-conjugated secondary antibodies (1:1000, Life Technologies,  
448 Eugene, OR) for 2 hours at room temperature. Nuclei were stained with Hoechst 33342  
449 (1:2000, cat #H1399, Fisher, Hampton, NH) for 20 minutes at room temperature, followed  
450 by mounting on slides in Prolong Gold (cat #P36930, Fisher, Hampton, NH). To increase  
451 the signal to noise ratio, some samples stained with anti-SOX2 antibodies were  
452 pretreated with signal enhancer (cat #136933, Life Technologies, Eugene, OR) for 30 min  
453 at room temperature before the blocking and permeabilization step. Samples were  
454 imaged using a Zeiss LSM 800 confocal microscope and processed with Zen Blue and  
455 ZEN 2.3 SP1 software (Carl Zeiss, Oberkochen, Germany).

456

457 **Cell counts**

458 Confocal z-stacks through the HC layer and corresponding SC layer were taken at two  
459 representative regions in each turn of the cochlear (apex, middle, and base). Labeled  
460 IHCs, OHCs, and different SC subtypes were quantified in two 150 or 200  $\mu\text{m}$   
461 representative regions in each turn of the cochlea. The length of the imaged segment  
462 (150 or 250  $\mu\text{m}$ ) was analyzed using Image J (<http://imagej.nih.gov/ij>) or Zen Blue  
463 software. HCs and SCs were manually counted in Photoshop CS5 (Adobe, San Jose,  
464 CA) or in Zen Blue software.

465

### 466 **Validation of *Jag1* deletion**

467 Immuno-staining with anti-JAG1 antibodies was used to validate deletion of *Jag1* from  
468 SCs using the *Jag1<sup>fx/fx</sup>* allele that was provided by Dr. Julian Lewis (Brooker et al., 2006).  
469 However, the *Jag1<sup>fx/fx</sup>* allele purchased from The Jackson Laboratories produces a  
470 truncated protein that was still detected by anti-JAG1 antibodies. Therefore, we used RT-  
471 PCR to validate the deletion of *Jag1* from SCs in these mice. Total RNA was extracted  
472 from P7 *Jag1<sup>fx/fx</sup>* and *Fgfr3-iCreER<sup>T2/+</sup>::Jag1<sup>fx/fx</sup>* cochleae using tri-reagent (cat #T9424,  
473 Sigma-Aldrich, St. Louis, MO). RNA was then precipitated with isopropanol (cat  
474 #327930010, Acros Organics, Geel, Belgium) overnight at  $-20^{\circ}\text{C}$ , purified with DNase  
475 treatment (cat #AM1906, Fisher, Hampton, NH) and re-precipitated with sodium acetate  
476 (cat #BP333, Fisher, Hampton, NH). Reverse transcription into cDNA was performed  
477 using Thermo Scientific Maxima First Strand cDNA synthesis kit (cat #K1641, Fisher,  
478 Hampton, NH, United States). cDNA was amplified with primers that flanked exon 4 of  
479 *Jag1* [forward: CGA CCG TAA TCG CAT CGT AC, reverse: AGT CCC ACA GTA ATT  
480 CAG ATC; (Kiernan et al., 2006)], separated on a 1% agarose gel and visualized with

481 GelRed nucleic acid stain (cat #41001, Biotium, Fremont, CA) using a Syngene G:Box  
482 Chemi imager (Syngene, Frederick, MD).

483

#### 484 **Microarray and RT-qPCR experiments**

485 For microarray and qPCR validation experiments control (*Jag1<sup>fx/fx</sup>*) and experimental  
486 animals (*Sox2<sup>CreERT2/+</sup>::Jag1<sup>fx/fx</sup>*) were harvested at P0 after receiving tamoxifen and  
487 progesterone at stage E14.5. Cochlear epithelia from individual animals were isolated  
488 using dispase/collagenase digest as previously described (Doetzlhofer et al., 2009). Total  
489 RNA was extracted using the RNeasy Micro Kit (cat #74004, QIAGEN, Germantown,  
490 MD). For the microarray experiment, total RNA was labeled with the Affymetrix GeneChip  
491 WT PLUS Reagent Kit using the manufacturer's protocol. Labeled RNA was hybridized  
492 onto Clariom D mouse microarray (Affymetrix, Santa Clara, CA) and chips were scanned  
493 and analyzed according to manufacturer's manuals. Affymetrix CEL files were extracted  
494 and data normalized with the Partek GS 6.6 platform (Partek Inc., Chesterfield, MO).  
495 Partek's extended meta-probe set was used with RMA normalization to create quantile-  
496 normalized log<sub>2</sub> transcript signal values, which were used in subsequent ANOVA  
497 analyses. The microarray data is deposited in the Gene Expression Omnibus (GEO) data  
498 base, accession number GSE148009. Results were validated using qPCR experiments  
499 where mRNA was reverse transcribed into cDNA using the iScript cDNA synthesis kit (cat  
500 #1708891, Bio-Rad, Hercules, CA). SYBR Green based qPCR was performed on a CFX-  
501 Connect Real Time PCR Detection System (Bio-Rad, Hercules, CA) using Fast SYBR®  
502 Green Master Mix reagent (cat #4385616, Applied Biosystems, Foster City, CA) and  
503 gene-specific primers. Relative gene expression was analyzed using the comparative CT

504 method (Schmittgen and Livak, 2008). The ribosomal gene *Rpl19* was used as reference  
505 gene and wild-type early postnatal cochlear tissue was used as calibrator. The following  
506 qPCR primers were used:

| Gene          | Forward Primer                  | Reverse Primer                  |
|---------------|---------------------------------|---------------------------------|
| <i>Apod</i>   | <i>GGCTTCAACGGTGTTTGTTT</i>     | <i>GAGGGTGGGATGTTCTCTGA</i>     |
| <i>Gpx1</i>   | <i>GTCCACCGTGTATGCCTTCT</i>     | <i>CTCCTGGTGTCCGAACTGAT</i>     |
| <i>Hey1</i>   | <i>CACTGCAGGAGGGAAAGGTTAT</i>   | <i>CCCCAAACTCCGATAGTCCAT</i>    |
| <i>Igfbp3</i> | <i>AACCTGCTCCAGGAAACATCAGT</i>  | <i>GCTTTCACACTCCCAGCAT</i>      |
| <i>Jag1</i>   | <i>TGTGCAAACATCACTTTCACCTTT</i> | <i>GCAAATGTGTTTCGGTGGTAAGAC</i> |
| <i>Mgst3</i>  | <i>TGAGAACGGGCATATGTTCA</i>     | <i>GCTTGCTAGGGTCTCCTGTG</i>     |
| <i>Rab3b</i>  | <i>TTCCGCTATGCTGATGACAC</i>     | <i>CCACGGTAGTAGGCTGTGGT</i>     |
| <i>Rpl19</i>  | <i>GGTCTGGTTGGATCCCAATG</i>     | <i>CCCGGGAATGGACAGTCA</i>       |
| <i>Stox1</i>  | <i>TGCACGCAGAGGATAAGACA</i>     | <i>CACTGTGACTCAAAGCCACC</i>     |
| <i>Timm13</i> | <i>GCCATTATGGAGCAGGTGAA</i>     | <i>CGCTGCAGTCGAGAGTTGTA</i>     |
| <i>Trpa1</i>  | <i>AACACGGCTTTGATGTCCAC</i>     | <i>GGGCTGGCTTTCTTGTGATT</i>     |

507

## 508 Gene Ontology Analysis

509 Gene ontology (GO) enrichment analysis was conducted using the Functional Annotation  
510 Tool in DAVID (Huang da et al., 2009b, Huang da et al., 2009a). A curated list of down-  
511 regulated genes ( $p\text{-value} \leq 0.05$ ,  $\log_2(\text{FC}) \leq -2\sigma$ , mean  $\log_2 \text{Ctrl} \geq 5$ ) was uploaded into  
512 the DAVID bioinformatics suite 6.8 and GO terms related to biological process (GOTERM  
513 BP DIRECT), molecular function (GOTERM MF DIRECT), cellular compartment  
514 (GOTERM CC DIRECT), and KEGG pathway term (KEGG PATHWAY) were obtained  
515 using default parameters.

516

## 517 **Auditory brainstem response (ABR) measurements**

518 To assess hearing after *Jag1* deletion, ABR was measured at P30 in *Fgfr3-*  
519 *iCreER<sup>T2/+</sup>::Jag1<sup>fx/fx</sup>* mice and iCre-negative littermates injected with tamoxifen at  
520 P0/P1. Before ABR recordings, mice were anesthetized with Avertin (250-500mg/kg, IP,  
521 Sigma-Aldrich, St. Louis, MO), and kept on a heating pad in a sound attenuated booth  
522 (Industrial Acoustic, Bronx, NY) throughout the whole procedure. One subdermal  
523 stainless-steel recording electrode was inserted at the vertex of the skull, with a second  
524 reference electrode inserted under the pinna of the left ear. A ground electrode was  
525 inserted at the base of the tail. An electrostatic speaker (EC1, Tucker Davis Technologies  
526 [TDT] System III, TDT, Alachua, FL) was fitted to a tube and inserted into the left ear  
527 canal. Acoustic signals were generated using a 16-bit D/A converter (RX6, TDT System  
528 III, TDT, Alachua, FL), controlled by a customized Auditory Neurophysiology Experiment  
529 Control Software (ANECS, Blue Hills Scientific, Boston, MA). To generate ABRs, pure  
530 tone bursts at 4, 8, 12, 16, and 22 kHz were presented at a rate of 19/sec, with a 5 ms  
531 duration, and repeated 512 times. Sound intensity at each frequency decreased from 80  
532 to 5 dB, with 5 dB steps. Two blinded reviewers determined the ABR thresholds, which  
533 were the lowest sound intensity that produced a visually distinct response in wave I or II.

534

## 535 **Statistical Analysis**

536 The sample size (n) represents the number of animals analyzed per group. Animals  
537 (biological replicates) were allocated into control or experimental groups based on  
538 genotype and/or type of treatment. To avoid bias, masking was used during data analysis.



539 P-values  $\leq 0.05$  were considered significant. Data was analyzed using Graphpad Prism  
540 6.02 and 8.0 (Graphpad Software Inc., La Jolla, CA).

541

## 542 **ACKNOWLEDGEMENTS**

543 We thank Dr. William Richardson at University College London for providing the *Fgfr3-*  
544 *iCreER<sup>T2</sup>* mouse line, and Dr. Julian Lewis at Cancer Research UK London Research  
545 Institute for providing one of the *Jag1<sup>fx/fx</sup>* mouse lines. This work was supported by grants  
546 from NIDCD [R01DC011571 (AD) and R01DC014441 (BC)] and the Office of the  
547 Assistant Secretary of Defense for Health Affairs [W81XWH-15-1-0475 (BC)]. The  
548 Southern Illinois University School of Medicine Research Imaging Facility is supported by  
549 a grant from the Office of Naval Research (N00014-15-1-2866).

550

## 551 **COMPETING INTERESTS**

552 Brandon C. Cox, PhD is a consultant for Turner Scientific, LLC, and Otonomy, Inc.

553 Other authors do not have anything to declare.

554

555

556

557

558

559

560

561

562

## 563 REFERENCES

- 564 ADAM, J., MYAT, A., LE ROUX, I., EDDISON, M., HENRIQUE, D., ISH-HOROWICZ, D. & LEWIS, J. 1998. Cell  
565 fate choices and the expression of Notch, Delta and Serrate homologues in the chick inner ear:  
566 parallels with *Drosophila* sense-organ development. *Development*, 125, 4645-54.
- 567 ANDROUTSELLIS-THEOTOKIS, A., LEKER, R. R., SOLDNER, F., HOEPPNER, D. J., RAVIN, R., POSER, S. W.,  
568 RUEGER, M. A., BAE, S. K., KITTAPPA, R. & MCKAY, R. D. 2006. Notch signalling regulates stem cell  
569 numbers in vitro and in vivo. *Nature*, 442, 823-6.
- 570 ARNOLD, K., SARKAR, A., YRAM, M. A., POLO, J. M., BRONSON, R., SENGUPTA, S., SEANDEL, M., GEIJSEN,  
571 N. & HOCHEDLINGER, K. 2011. Sox2(+) adult stem and progenitor cells are important for tissue  
572 regeneration and survival of mice. *Cell Stem Cell*, 9, 317-29.
- 573 ATKINSON, P. J., DONG, Y., GU, S., LIU, W., NAJARRO, E. H., UDAGAWA, T. & CHENG, A. G. 2018. Sox2  
574 haploinsufficiency primes regeneration and Wnt responsiveness in the mouse cochlea. *J Clin*  
575 *Invest*, 128, 1641-1656.
- 576 BASCH, M. L., OHYAMA, T., SEGIL, N. & GROVES, A. K. 2011. Canonical Notch signaling is not necessary for  
577 prosensory induction in the mouse cochlea: insights from a conditional mutant of RBPjkappa. *J*  
578 *Neurosci*, 31, 8046-58.
- 579 BELLAVIA, D., CAMPESE, A. F., ALESSE, E., VACCA, A., FELLI, M. P., BALESTRI, A., STOPPACCIARO, A.,  
580 TIVERON, C., TATANGELO, L., GIOVARELLI, M., GAETANO, C., RUCO, L., HOFFMAN, E. S., HAYDAY,  
581 A. C., LENDAHL, U., FRATI, L., GULINO, A. & SCREPANTI, I. 2000. Constitutive activation of NF-  
582 kappaB and T-cell leukemia/lymphoma in Notch3 transgenic mice. *EMBO J*, 19, 3337-48.
- 583 BERMINGHAM, N. A., HASSAN, B. A., PRICE, S. D., VOLLRATH, M. A., BEN-ARIE, N., EATOCK, R. A., BELLEN,  
584 H. J., LYSAKOWSKI, A. & ZOGHBI, H. Y. 1999. Math1: an essential gene for the generation of inner  
585 ear hair cells. *Science*, 284, 1837-41.
- 586 BROOKER, R., HOZUMI, K. & LEWIS, J. 2006. Notch ligands with contrasting functions: Jagged1 and Delta1  
587 in the mouse inner ear. *Development*, 133, 1277-86.
- 588 BROWN, R. M., 2ND, NELSON, J. C., ZHANG, H., KIERNAN, A. E. & GROVES, A. K. 2020. Notch-mediated  
589 lateral induction is necessary to maintain vestibular prosensory identity during inner ear  
590 development. *Dev Biol*.
- 591 BUCKIOVA, D. & SYKA, J. 2009. Calbindin and S100 protein expression in the developing inner ear in mice.  
592 *J Comp Neurol*, 513, 469-82.
- 593 BURNS, J. C., KELLY, M. C., HOA, M., MORELL, R. J. & KELLEY, M. W. 2015. Single-cell RNA-Seq resolves  
594 cellular complexity in sensory organs from the neonatal inner ear. *Nat Commun*, 6, 8557.
- 595 CAMPBELL, D. P., CHRYSOSTOMOU, E. & DOETZLHOFER, A. 2016. Canonical Notch signaling plays an  
596 instructive role in auditory supporting cell development. *Sci Rep*, 6, 19484.
- 597 CHAN, S. M., WENG, A. P., TIBSHIRANI, R., ASTER, J. C. & UTZ, P. J. 2007. Notch signals positively regulate  
598 activity of the mTOR pathway in T-cell acute lymphoblastic leukemia. *Blood*, 110, 278-86.
- 599 CHEN, P., JOHNSON, J. E., ZOGHBI, H. Y. & SEGIL, N. 2002. The role of Math1 in inner ear development:  
600 Uncoupling the establishment of the sensory primordium from hair cell fate determination.  
601 *Development*, 129, 2495-505.
- 602 COHEN, R., AMIR-ZILBERSTEIN, L., HERSCH, M., WOLAND, S., TAIBER, S., MATSUZAKI, F., BERGMANN, S.,  
603 AVRAHAM, K. & SPRINZAK, D. 2019. Shear forces drive precise patterning of hair cells in the  
604 mammalian inner ear. bioRxiv.
- 605 COREY, D. P., GARCIA-ANOVEROS, J., HOLT, J. R., KWAN, K. Y., LIN, S. Y., VOLLRATH, M. A., AMALFITANO,  
606 A., CHEUNG, E. L., DERFLER, B. H., DUGGAN, A., GELEOC, G. S., GRAY, P. A., HOFFMAN, M. P.,  
607 REHM, H. L., TAMASAUSKAS, D. & ZHANG, D. S. 2004. TRPA1 is a candidate for the  
608 mechanosensitive transduction channel of vertebrate hair cells. *Nature*, 432, 723-30.

- 609 COX, B. C., LIU, Z., LAGARDE, M. M. & ZUO, J. 2012. Conditional gene expression in the mouse inner ear  
610 using Cre-loxP. *J Assoc Res Otolaryngol*, 13, 295-322.
- 611 DAUDET, N. & LEWIS, J. 2005. Two contrasting roles for Notch activity in chick inner ear development:  
612 specification of prosensory patches and lateral inhibition of hair-cell differentiation. *Development*,  
613 132, 541-51.
- 614 DAUDET, N. & ZAK, M. 2020. Notch Signalling: The Multitask Manager of Inner Ear Development and  
615 Regeneration. *Adv Exp Med Biol*, 1218, 129-157.
- 616 DOETZLHOFER, A., BASCH, M. L., OHYAMA, T., GESSLER, M., GROVES, A. K. & SEGIL, N. 2009. Hey2  
617 regulation by FGF provides a Notch-independent mechanism for maintaining pillar cell fate in the  
618 organ of Corti. *Dev Cell*, 16, 58-69.
- 619 EDDISON, M., LE ROUX, I. & LEWIS, J. 2000. Notch signaling in the development of the inner ear: lessons  
620 from *Drosophila*. *Proc Natl Acad Sci U S A*, 97, 11692-9.
- 621 GANFORNINA, M. D., DO CARMO, S., LORA, J. M., TORRES-SCHUMANN, S., VOGEL, M., ALLHORN, M.,  
622 GONZALEZ, C., BASTIANI, M. J., RASSART, E. & SANCHEZ, D. 2008. Apolipoprotein D is involved in  
623 the mechanisms regulating protection from oxidative stress. *Aging Cell*, 7, 506-15.
- 624 GAO, S. S., WANG, R., RAPHAEL, P. D., MOAYEDI, Y., GROVES, A. K., ZUO, J., APPEGATE, B. E. & OGHALAI,  
625 J. S. 2014. Vibration of the organ of Corti within the cochlear apex in mice. *J Neurophysiol*, 112,  
626 1192-204.
- 627 GU, R., BROWN, R. M., 2ND, HSU, C. W., CAI, T., CROWDER, A. L., PIAZZA, V. G., VADAKKAN, T. J.,  
628 DICKINSON, M. E. & GROVES, A. K. 2016. Lineage tracing of Sox2-expressing progenitor cells in the  
629 mouse inner ear reveals a broad contribution to non-sensory tissues and insights into the origin  
630 of the organ of Corti. *Dev Biol*, 414, 72-84.
- 631 HAO, J., KOESTERS, R., BOUCHARD, M., GRIDLEY, T., PFANNENSTIEL, S., PLINKERT, P. K., ZHANG, L. &  
632 PRAETORIUS, M. 2012. Jagged1-mediated Notch signaling regulates mammalian inner ear  
633 development independent of lateral inhibition. *Acta Otolaryngol*, 132, 1028-35.
- 634 HARTMAN, B. H., HAYASHI, T., NELSON, B. R., BERMINGHAM-MCDONOGH, O. & REH, T. A. 2007. Dll3 is  
635 expressed in developing hair cells in the mammalian cochlea. *Dev Dyn*, 236, 2875-83.
- 636 HARTMAN, B. H., REH, T. A. & BERMINGHAM-MCDONOGH, O. 2010. Notch signaling specifies prosensory  
637 domains via lateral induction in the developing mammalian inner ear. *Proc Natl Acad Sci U S A*,  
638 107, 15792-7.
- 639 HASSON, T., HEINTZELMAN, M. B., SANTOS-SACCHI, J., COREY, D. P. & MOOSEKER, M. S. 1995. Expression  
640 in cochlea and retina of myosin VIIa, the gene product defective in Usher syndrome type 1B. *Proc  
641 Natl Acad Sci U S A*, 92, 9815-9.
- 642 HERTZANO, R., PULIGILLA, C., CHAN, S. L., TIMOTHY, C., DEPIREUX, D. A., AHMED, Z., WOLF, J., EISENMAN,  
643 D. J., FRIEDMAN, T. B., RIAZUDDIN, S., KELLEY, M. W. & STROME, S. E. 2010. CD44 is a marker for  
644 the outer pillar cells in the early postnatal mouse inner ear. *J Assoc Res Otolaryngol*, 11, 407-18.
- 645 HOSSAIN, F., SORRENTINO, C., UCAR, D. A., PENG, Y., MATOSSIAN, M., WYCZECZOWSKA, D., CRABTREE,  
646 J., ZABALETA, J., MORELLO, S., DEL VALLE, L., BUROW, M., COLLINS-BUROW, B., PANNUTI, A.,  
647 MINTER, L. M., GOLDE, T. E., OSBORNE, B. A. & MIELE, L. 2018. Notch Signaling Regulates  
648 Mitochondrial Metabolism and NF-kappaB Activity in Triple-Negative Breast Cancer Cells via  
649 IKKalpha-Dependent Non-canonical Pathways. *Front Oncol*, 8, 575.
- 650 HUANG DA, W., SHERMAN, B. T. & LEMPICKI, R. A. 2009a. Bioinformatics enrichment tools: paths toward  
651 the comprehensive functional analysis of large gene lists. *Nucleic Acids Res*, 37, 1-13.
- 652 HUANG DA, W., SHERMAN, B. T. & LEMPICKI, R. A. 2009b. Systematic and integrative analysis of large  
653 gene lists using DAVID bioinformatics resources. *Nat Protoc*, 4, 44-57.
- 654 KEMPFFLE, J. S., TURBAN, J. L. & EDGE, A. S. 2016. Sox2 in the differentiation of cochlear progenitor cells.  
655 *Sci Rep*, 6, 23293.

- 656 KIERNAN, A. E., CORDES, R., KOPAN, R., GOSSLER, A. & GRIDLEY, T. 2005. The Notch ligands DLL1 and JAG2  
657 act synergistically to regulate hair cell development in the mammalian inner ear. *Development*,  
658 132, 4353-62.
- 659 KIERNAN, A. E., XU, J. & GRIDLEY, T. 2006. The Notch ligand JAG1 is required for sensory progenitor  
660 development in the mammalian inner ear. *PLoS Genet*, 2, e4.
- 661 KIKUCHI, T., KIMURA, R. S., PAUL, D. L. & ADAMS, J. C. 1995. Gap junctions in the rat cochlea:  
662 immunohistochemical and ultrastructural analysis. *Anat Embryol (Berl)*, 191, 101-18.
- 663 KIM, D. K., KIM, J. A., PARK, J., NIAZI, A., ALMISHAAL, A. & PARK, S. 2019. The release of surface-anchored  
664 alpha-tectorin, an apical extracellular matrix protein, mediates tectorial membrane organization.  
665 *Sci Adv*, 5, eaay6300.
- 666 KIRJAVAINEN, A., LAOS, M., ANTONEN, T. & PIRVOLA, U. 2015. The Rho GTPase Cdc42 regulates hair cell  
667 planar polarity and cellular patterning in the developing cochlea. *Biol Open*, 4, 516-26.
- 668 KOPAN, R. & ILAGAN, M. X. 2009. The canonical Notch signaling pathway: unfolding the activation  
669 mechanism. *Cell*, 137, 216-33.
- 670 LANFORD, P. J., LAN, Y., JIANG, R., LINDSELL, C., WEINMASTER, G., GRIDLEY, T. & KELLEY, M. W. 1999.  
671 Notch signalling pathway mediates hair cell development in mammalian cochlea. *Nat Genet*, 21,  
672 289-92.
- 673 LAUTERMANN, J., TEN CATE, W. J., ALTENHOFF, P., GRUMMER, R., TRAUB, O., FRANK, H., JAHNKE, K. &  
674 WINTERHAGER, E. 1998. Expression of the gap-junction connexins 26 and 30 in the rat cochlea.  
675 *Cell Tissue Res*, 294, 415-20.
- 676 LEGENDRE, K., SAFIEDDINE, S., KUSSEL-ANDERMANN, P., PETIT, C. & EL-AMRAOUI, A. 2008. alphaII-betaV  
677 spectrin bridges the plasma membrane and cortical lattice in the lateral wall of the auditory outer  
678 hair cells. *J Cell Sci*, 121, 3347-56.
- 679 LELLI, A., ASAI, Y., FORGE, A., HOLT, J. R. & GELEOC, G. S. 2009. Tonotopic gradient in the developmental  
680 acquisition of sensory transduction in outer hair cells of the mouse cochlea. *J Neurophysiol*, 101,  
681 2961-73.
- 682 LI, J. & VERKMAN, A. S. 2001. Impaired hearing in mice lacking aquaporin-4 water channels. *J Biol Chem*,  
683 276, 31233-7.
- 684 LI, S., MARK, S., RADDE-GALLWITZ, K., SCHLISNER, R., CHIN, M. T. & CHEN, P. 2008. Hey2 functions in  
685 parallel with Hes1 and Hes5 for mammalian auditory sensory organ development. *BMC Dev Biol*,  
686 8, 20.
- 687 LU, L., PANDEY, A. K., HOUSEAL, M. T. & MULLIGAN, M. K. 2016. The Genetic Architecture of Murine  
688 Glutathione Transferases. *PLoS One*, 11, e0148230.
- 689 MAASS, J. C., GU, R., BASCH, M. L., WALDHAUS, J., LOPEZ, E. M., XIA, A., OGHALAI, J. S., HELLER, S. &  
690 GROVES, A. K. 2015. Changes in the regulation of the Notch signaling pathway are temporally  
691 correlated with regenerative failure in the mouse cochlea. *Front Cell Neurosci*, 9, 110.
- 692 MAASS, J. C., GU, R., CAI, T., WAN, Y. W., CANTELLANO, S. C., ASPRER, J. S., ZHANG, H., JEN, H. I., EDLUND,  
693 R. K., LIU, Z. & GROVES, A. K. 2016. Transcriptomic Analysis of Mouse Cochlear Supporting Cell  
694 Maturation Reveals Large-Scale Changes in Notch Responsiveness Prior to the Onset of Hearing.  
695 *PLoS One*, 11, e0167286.
- 696 MADISEN, L., ZWINGMAN, T. A., SUNKIN, S. M., OH, S. W., ZARIWALA, H. A., GU, H., NG, L. L., PALMITER,  
697 R. D., HAWRYLYCZ, M. J., JONES, A. R., LEIN, E. S. & ZENG, H. 2010. A robust and high-throughput  
698 Cre reporting and characterization system for the whole mouse brain. *Nat Neurosci*, 13, 133-40.
- 699 MANN, Z. F., GALVEZ, H., PEDRENO, D., CHEN, Z., CHRYSOSTOMOU, E., ZAK, M., KANG, M., CANDEN, E. &  
700 DAUDET, N. 2017. Shaping of inner ear sensory organs through antagonistic interactions between  
701 Notch signalling and Lmx1a. *Elife*, 6.
- 702 MASON, H. A., RAKOWIECKI, S. M., GRIDLEY, T. & FISHELL, G. 2006. Loss of notch activity in the developing  
703 central nervous system leads to increased cell death. *Dev Neurosci*, 28, 49-57.

- 704 MCGOVERN, M. M., BRANCHECK, J., GRANT, A. C., GRAVES, K. A. & COX, B. C. 2017. Quantitative Analysis  
705 of Supporting Cell Subtype Labeling Among CreER Lines in the Neonatal Mouse Cochlea. *J Assoc*  
706 *Res Otolaryngol*, 18, 227-245.
- 707 MONTGOMERY, S. C. & COX, B. C. 2016. Whole Mount Dissection and Immunofluorescence of the Adult  
708 Mouse Cochlea. *J Vis Exp*.
- 709 MORRISON, A., HODGETTS, C., GOSSLER, A., HRABE DE ANGELIS, M. & LEWIS, J. 1999. Expression of Delta1  
710 and Serrate1 (Jagged1) in the mouse inner ear. *Mech Dev*, 84, 169-72.
- 711 MURATA, J., TOKUNAGA, A., OKANO, H. & KUBO, T. 2006. Mapping of notch activation during cochlear  
712 development in mice: implications for determination of prosensory domain and cell fate  
713 diversification. *J Comp Neurol*, 497, 502-18.
- 714 NEVES, J., PARADA, C., CHAMIZO, M. & GIRALDEZ, F. 2011. Jagged 1 regulates the restriction of Sox2  
715 expression in the developing chicken inner ear: a mechanism for sensory organ specification.  
716 *Development*, 138, 735-44.
- 717 NIE, X., ZHANG, K., WANG, L., OU, G., ZHU, H. & GAO, W. Q. 2015. Transcription factor STOX1 regulates  
718 proliferation of inner ear epithelial cells via the AKT pathway. *Cell Prolif*, 48, 209-20.
- 719 OESTERLE, E. C., CAMPBELL, S., TAYLOR, R. R., FORGE, A. & HUME, C. R. 2008. Sox2 and JAGGED1  
720 expression in normal and drug-damaged adult mouse inner ear. *J Assoc Res Otolaryngol*, 9, 65-89.
- 721 OHLEMILLER, K. K., MCFADDEN, S. L., DING, D. L., LEAR, P. M. & HO, Y. S. 2000. Targeted mutation of the  
722 gene for cellular glutathione peroxidase (Gpx1) increases noise-induced hearing loss in mice. *J*  
723 *Assoc Res Otolaryngol*, 1, 243-54.
- 724 OISHI, K., KAMAKURA, S., ISAZAWA, Y., YOSHIMATSU, T., KUIDA, K., NAKAFUKU, M., MASUYAMA, N. &  
725 GOTOH, Y. 2004. Notch promotes survival of neural precursor cells via mechanisms distinct from  
726 those regulating neurogenesis. *Dev Biol*, 276, 172-84.
- 727 PAN, W., JIN, Y., STANGER, B. & KIERNAN, A. E. 2010. Notch signaling is required for the generation of hair  
728 cells and supporting cells in the mammalian inner ear. *Proc Natl Acad Sci U S A*, 107, 15798-803.
- 729 PERUMALSAMY, L. R., NAGALA, M. & SARIN, A. 2010. Notch-activated signaling cascade interacts with  
730 mitochondrial remodeling proteins to regulate cell survival. *Proc Natl Acad Sci U S A*, 107, 6882-  
731 7.
- 732 PETROVIC, J., FORMOSA-JORDAN, P., LUNA-ESCALANTE, J. C., ABELLO, G., IBANES, M., NEVES, J. &  
733 GIRALDEZ, F. 2014. Ligand-dependent Notch signaling strength orchestrates lateral induction and  
734 lateral inhibition in the developing inner ear. *Development*, 141, 2313-24.
- 735 PUROW, B. W., HAQUE, R. M., NOEL, M. W., SU, Q., BURDICK, M. J., LEE, J., SUNDARESAN, T., PASTORINO,  
736 S., PARK, J. K., MIKOLAENKO, I., MARIC, D., EBERHART, C. G. & FINE, H. A. 2005. Expression of  
737 Notch-1 and its ligands, Delta-like-1 and Jagged-1, is critical for glioma cell survival and  
738 proliferation. *Cancer Res*, 65, 2353-63.
- 739 RAU, A., LEGAN, P. K. & RICHARDSON, G. P. 1999. Tectorin mRNA expression is spatially and temporally  
740 restricted during mouse inner ear development. *J Comp Neurol*, 405, 271-80.
- 741 RIVERS, L. E., YOUNG, K. M., RIZZI, M., JAMEN, F., PSACHOULIA, K., WADE, A., KESSARIS, N. & RICHARDSON,  
742 W. D. 2008. PDGFRA/NG2 glia generate myelinating oligodendrocytes and piriform projection  
743 neurons in adult mice. *Nat Neurosci*, 11, 1392-401.
- 744 ROTHBAUER, U., HOFMANN, S., MUHLENBEIN, N., PASCHEN, S. A., GERBITZ, K. D., NEUPERT, W.,  
745 BRUNNER, M. & BAUER, M. F. 2001. Role of the deafness dystonia peptide 1 (DDP1) in import of  
746 human Tim23 into the inner membrane of mitochondria. *J Biol Chem*, 276, 37327-34.
- 747 SAINO-SAITO, S., SUZUKI, R., TOKUDA, N., ABE, H., KONDO, H. & OWADA, Y. 2010. Localization of fatty  
748 acid binding proteins (FABPs) in the cochlea of mice. *Ann Anat*, 192, 210-4.
- 749 SATO, Y. & SANTOS-SACCHI, J. 1994. Cell coupling in the supporting cells of Corti's organ: sensitivity to  
750 intracellular H<sup>+</sup> and Ca<sup>2+</sup>. *Hear Res*, 80, 21-4.

- 751 SAXTON, R. A. & SABATINI, D. M. 2017. mTOR Signaling in Growth, Metabolism, and Disease. *Cell*, 169,  
752 361-371.
- 753 SCHMITTGEN, T. D. & LIVAK, K. J. 2008. Analyzing real-time PCR data by the comparative C(T) method. *Nat*  
754 *Protoc*, 3, 1101-8.
- 755 SON, E. J., WU, L., YOON, H., KIM, S., CHOI, J. Y. & BOK, J. 2012. Developmental gene expression profiling  
756 along the tonotopic axis of the mouse cochlea. *PLoS One*, 7, e40735.
- 757 SZARAMA, K. B., GAVARA, N., PETRALIA, R. S., KELLEY, M. W. & CHADWICK, R. S. 2012. Cytoskeletal  
758 changes in actin and microtubules underlie the developing surface mechanical properties of  
759 sensory and supporting cells in the mouse cochlea. *Development*, 139, 2187-97.
- 760 TAKEBAYASHI, S., YAMAMOTO, N., YABE, D., FUKUDA, H., KOJIMA, K., ITO, J. & HONJO, T. 2007. Multiple  
761 roles of Notch signaling in cochlear development. *Dev Biol*, 307, 165-78.
- 762 TAKUMI, Y., NAGELHUS, E. A., EIDET, J., MATSUBARA, A., USAMI, S., SHINKAWA, H., NIELSEN, S. &  
763 OTTERSEN, O. P. 1998. Select types of supporting cell in the inner ear express aquaporin-4 water  
764 channel protein. *Eur J Neurosci*, 10, 3584-95.
- 765 TANG, L. S., ALGER, H. M. & PEREIRA, F. A. 2006. COUP-TFI controls Notch regulation of hair cell and  
766 support cell differentiation. *Development*, 133, 3683-93.
- 767 TATEYA, T., IMAYOSHI, I., TATEYA, I., ITO, J. & KAGEYAMA, R. 2011. Cooperative functions of Hes/Hey  
768 genes in auditory hair cell and supporting cell development. *Dev Biol*, 352, 329-40.
- 769 WALTERS, B. J., YAMASHITA, T. & ZUO, J. 2015. Sox2-CreER mice are useful for fate mapping of mature,  
770 but not neonatal, cochlear supporting cells in hair cell regeneration studies. *Sci Rep*, 5, 11621.
- 771 WHITE, P. M., DOETZLHOFER, A., LEE, Y. S., GROVES, A. K. & SEGIL, N. 2006. Mammalian cochlear  
772 supporting cells can divide and trans-differentiate into hair cells. *Nature*, 441, 984-7.
- 773 WOODS, C., MONTCOUQUIOL, M. & KELLEY, M. W. 2004. Math1 regulates development of the sensory  
774 epithelium in the mammalian cochlea. *Nat Neurosci*, 7, 1310-8.
- 775 YAMAMOTO, N., CHANG, W. & KELLEY, M. W. 2011. Rbpj regulates development of prosensory cells in  
776 the mammalian inner ear. *Dev Biol*, 353, 367-79.
- 777 YAMAMOTO, N., TANIGAKI, K., TSUJI, M., YABE, D., ITO, J. & HONJO, T. 2006. Inhibition of Notch/RBP-J  
778 signaling induces hair cell formation in neonate mouse cochleas. *J Mol Med (Berl)*, 84, 37-45.
- 779 YOUNG, K. M., MITSUMORI, T., PRINGLE, N., GRIST, M., KESSARIS, N. & RICHARDSON, W. D. 2010. An  
780 Fgfr3-iCreER(T2) transgenic mouse line for studies of neural stem cells and astrocytes. *Glia*, 58,  
781 943-53.
- 782 ZHENG, J. L. & GAO, W. Q. 2000. Overexpression of Math1 induces robust production of extra hair cells in  
783 postnatal rat inner ears. *Nat Neurosci*, 3, 580-6.
- 784 ZINE, A., AUBERT, A., QIU, J., THERIANOS, S., GUILLEMOT, F., KAGEYAMA, R. & DE RIBAUPIERRE, F. 2001.  
785 Hes1 and Hes5 activities are required for the normal development of the hair cells in the  
786 mammalian inner ear. *J Neurosci*, 21, 4712-20.
- 787 ZWISLOCKI, J. J., SLEPECKY, N. B., CEFARATTI, L. K. & SMITH, R. L. 1992. Ionic coupling among cells in the  
788 organ of Corti. *Hear Res*, 57, 175-94.

789

790

791

792

793 **FIGURES**

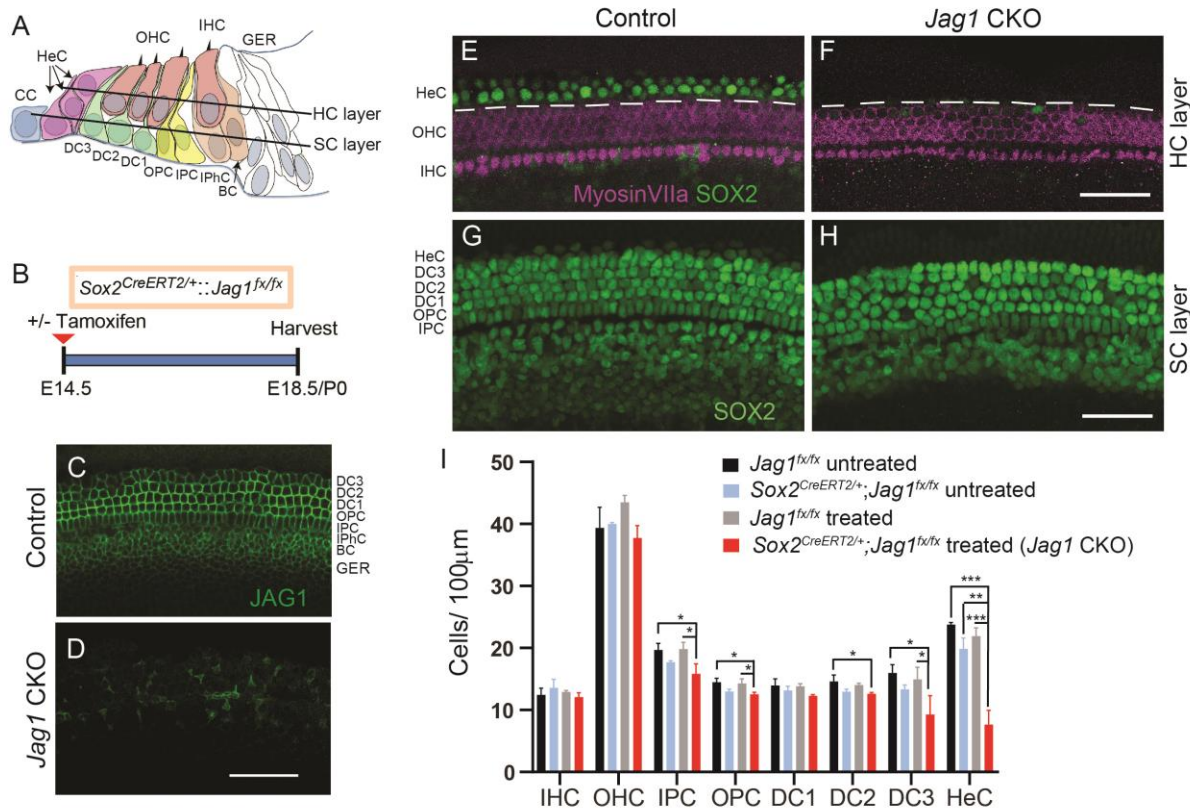

794

795 **Figure 1. Deletion of *Jag1* from stage E14.5 progenitor cells disrupts HeC**  
 796 **formation. (A)** Schematic of the cellular composition of the neonatal auditory sensory  
 797 epithelium. Abbreviations: BC, Border cell; CC, Claudius cell; DC1, Deiters' cell row 1;  
 798 DC2, Deiters' cell row 2; DC3, Deiters' cell row 3; GER, greater epithelial ridge; HeC,  
 799 Hensen's cell; HC, hair cell; IHC, inner hair cell; IPC, inner pillar cell; OHC, outer hair cell;  
 800 OPC, outer pillar cell; SC, supporting cell. **(B)** Experimental strategy. Timed pregnant  
 801 dams were injected with tamoxifen and progesterone at E14.5. *Jag1* conditional knockout  
 802 (CKO) ( $Sox2^{CreERT2/+}; Jag1^{f/f}$  treated) mice and control ( $Jag1^{f/f}$  treated) littermates were  
 803 analyzed at E18.5/P0. SOX2 immuno-staining labels SC nuclei including HeCs, while  
 804 myosin VIIa immuno-staining labels IHCs and OHCs. Representative confocal images of

805 the cochlear mid-turn are shown. To control for *Sox2* haploinsufficiency, E18.5/P0  
806 *Sox2<sup>CreERT2/+::Jag1<sup>fx/fx</sup></sup>* mice and *Jag1<sup>fx/fx</sup>* littermates that did not receive tamoxifen and  
807 progesterone (untreated) were also analyzed. **(C-D)** Validation of *Jag1* deletion. SC  
808 nuclear layer, immuno-stained for JAG1 (green), in *Jag1* CKO (D) and control (C, treated,  
809 *Jag1<sup>fx/fx</sup>*) mice. **(E-F)** HC and HeC phenotype in P0 control (E, *Sox2<sup>CreERT2/+::Jag1<sup>fx/fx</sup></sup>*  
810 untreated) and P0 *Jag1* CKO (F) mice. Note control mice (E) contain 1-2 rows of SOX2<sup>+</sup>  
811 (green) HeCs lateral to the myosin VIIa<sup>+</sup> (magenta) OHCs (dashed white line) (see  
812 schematic in A). **(G-H)** SC phenotype in E18.5 control (G, *Jag1<sup>fx/fx</sup>* treated) and E18.5  
813 *Jag1* CKO (H) mice. Note that DC nuclei are enlarged and misaligned in *Jag1* CKO mice.  
814 **(I)** Quantification of HC and SC subtypes in control and *Jag1* CKO mice. Data expressed  
815 as mean ± SD (n=3/group; two-way ANOVA, with Bonferroni correction was used to  
816 calculate p-values, \*p<0.05, \*\*p ≤0.001, \*\*\*p≤0.0001). Scale bar: 50 μm.



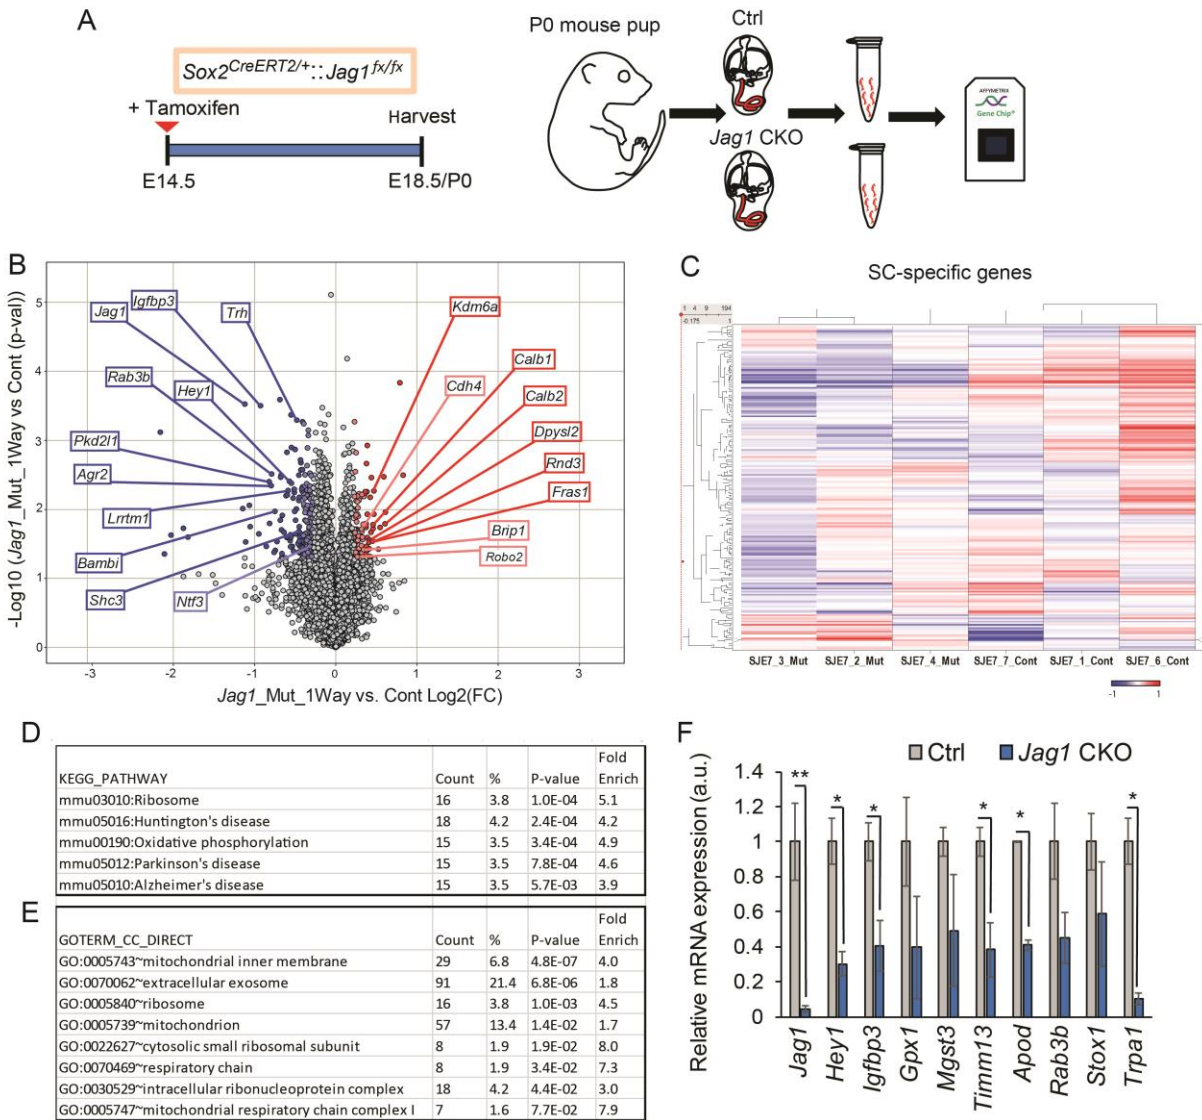

817

818 **Figure 2. Loss of JAG1 leads to the downregulation of genes involved in**  
 819 **mitochondrial function and protein synthesis. (A) Experimental strategy. Timed**  
 820 **pregnant dams were injected with tamoxifen and progesterone at E14.5 and gene**  
 821 **expression in cochlear epithelia from E18.5/P0 *Jag1* conditional knockout (CKO),**  
 822 **(*Sox2*<sup>CreERT2/+</sup>::*Jag1*<sup>fx/fx</sup>) mice and control (Ctrl, *Jag1*<sup>fx/fx</sup>) littermates was analyzed using**  
 823 **Clariom D mouse arrays. (B) Volcano plot presents the one-way ANOVA analysis of**  
 824 **differential gene expression in *Jag1* CKO versus control samples (n=3 animals/group).**

825 Plotted as log<sub>2</sub> fold-change (FC) (x-axis) versus -log<sub>10</sub> p-value (y-axis). Dark blue (log<sub>2</sub>  
826 (FC) < -6σ) and light blue (log<sub>2</sub> (FC) < -3σ) dots represent downregulated genes. Dark red  
827 (log<sub>2</sub> (FC) > 6σ) and light red dots (log<sub>2</sub> (FC) > 3σ) represents upregulated genes. **(C)**  
828 Heat cluster map illustrating JAG1-mediated effects on a list of 200 SC-specific genes  
829 curated from published data. **(D-E)** Gene ontology (GO) analysis of genes down-  
830 regulated (p-value ≤ 0.05, log<sub>2</sub> (FC) ≤ 2σ) in P0 *Jag1* CKO versus control (Ctrl) cochlear  
831 epithelia. Listed are significantly enriched (Bonferroni corrected p-value ≤ 0.05) pathways  
832 (D) and cellular component (E) GO terms. **(F)** RT-qPCR-based validation of genes of  
833 interest that were downregulated at P0 in *Jag1* CKO cochlear epithelia compared to Ctrl.  
834 Data expressed as mean ± SEM (minimum of n=3 animals/ group, two-tailed Students t-  
835 test was used to calculate p-values, \*p<0.05, \*\*p ≤ 0.001).

836

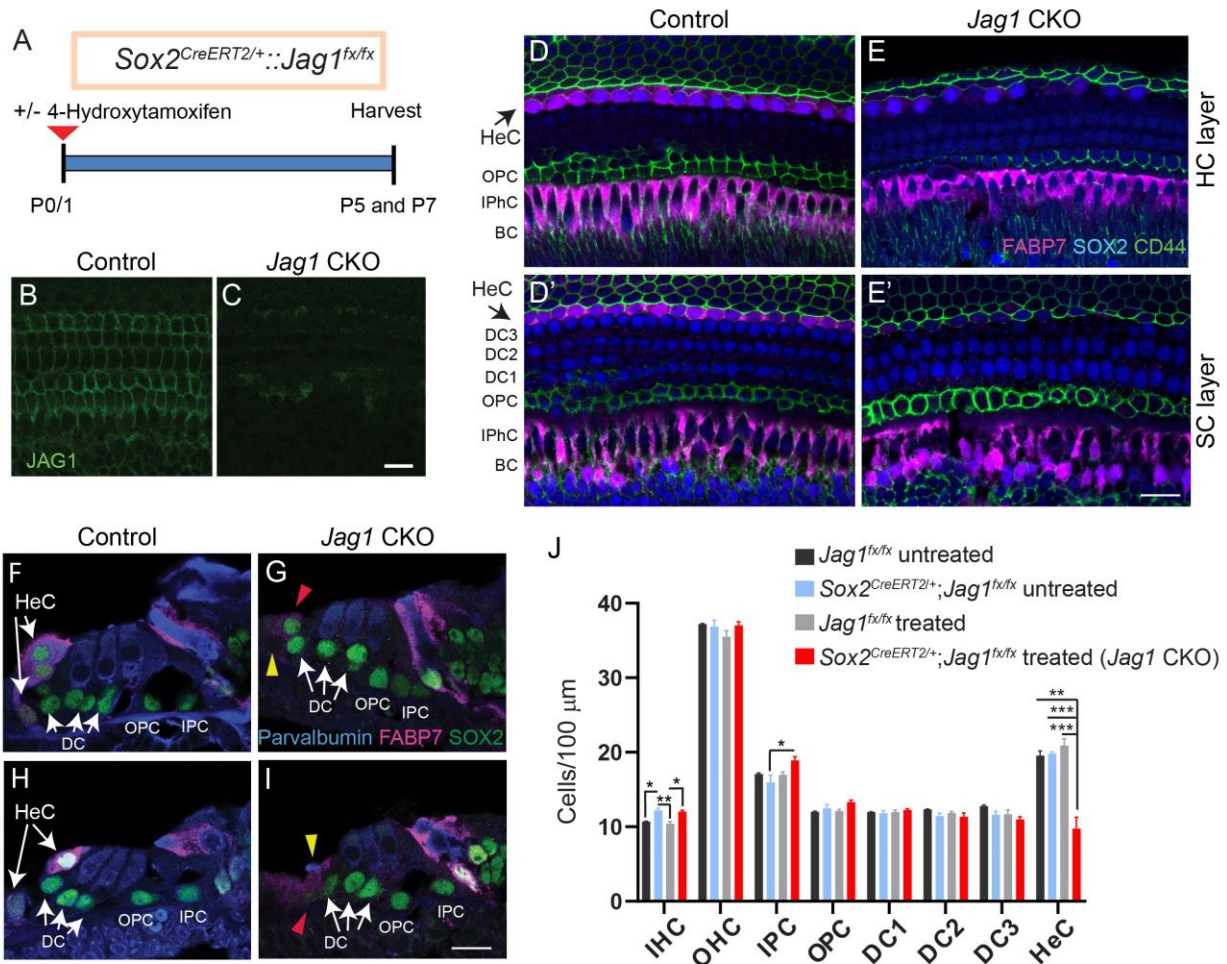

837

838 **Figure 3. Deletion of *Jag1* from neonatal SCs results in the loss of HeCs. (A)**

839 Experimental strategy. *Sox2<sup>CreERT2/+</sup>;Jag1<sup>fx/fx</sup>* and *Jag1<sup>fx/fx</sup>* were treated with 4-hydroxy-

840 tamoxifen at P0/P1 and their cochleae were analyzed at P5 or P7. Untreated control mice

841 (*Sox2<sup>CreERT2/+</sup>;Jag1<sup>fx/fx</sup>* untreated and *Jag1<sup>fx/fx</sup>*, untreated) were also used. SOX2 immuno-

842 staining labels SC nuclei including HeCs. FABP7 labels HeCs, IPhCs and BCs.

843 Parvalbumin labels HCs and CD44 labels CCs and OPCs. Shown are representative

844 single plane confocal images of the cochlear mid-turn. **(B-C)** Validation of conditional

845 *Jag1* deletion. Shown is the SC nuclear layer, immuno-stained for JAG1 (green), in *Jag1*

846 CKO (C) and control (B, *Jag1<sup>fx/fx</sup>* treated) mice. **(D-E')** Top down view of the HC (D, E)

847 and SC nuclear layers (D', E') in *Jag1* CKO (E, E') and control (D, D',  
848 *Sox2<sup>CreERT2/+</sup>::Jag1<sup>fx/fx</sup>* untreated) mice. Black arrows indicate the location of HeCs  
849 residing within the HC (D) and SC layer (D') in control mice. **(F-I)** Cochlear cross-sections  
850 of *Jag1* CKO (G, I) and control mice (F, H, *Sox2<sup>CreERT2/+</sup>::Jag1<sup>fx/fx</sup>*, untreated). White  
851 arrows indicate 2-3 HeC nuclei that are stacked on top of each other in control mice. Red  
852 arrowheads indicate SOX2<sup>+</sup> HeC-like cells (G, I) and yellow arrowheads indicate dying  
853 cell (I) and missing HeC (G) in *Jag1* CKO mice. **(J)** Quantification of HC and SC subtypes  
854 in control and *Jag1* CKO mice. Data expressed as mean  $\pm$  SD (n=3/ group; two-way  
855 ANOVA, with Bonferroni correction was used to calculate p-values, \*p<0.05, \*\*p  $\leq$ 0.001,  
856 \*\*\*p $\leq$ 0.0001). Abbreviations: IHC, inner hair cell; OHC, outer hair cell; IPC, inner pillar  
857 cell; OPC, outer pillar cell; DC1, Deiters' cell row 1; DC2, Deiters' cell row 2; DC3, Deiters'  
858 cell row 3; HeC, Hensen's cell. Scale bar: 20  $\mu$ m.

859

860

861

862

863

864

865

866

867

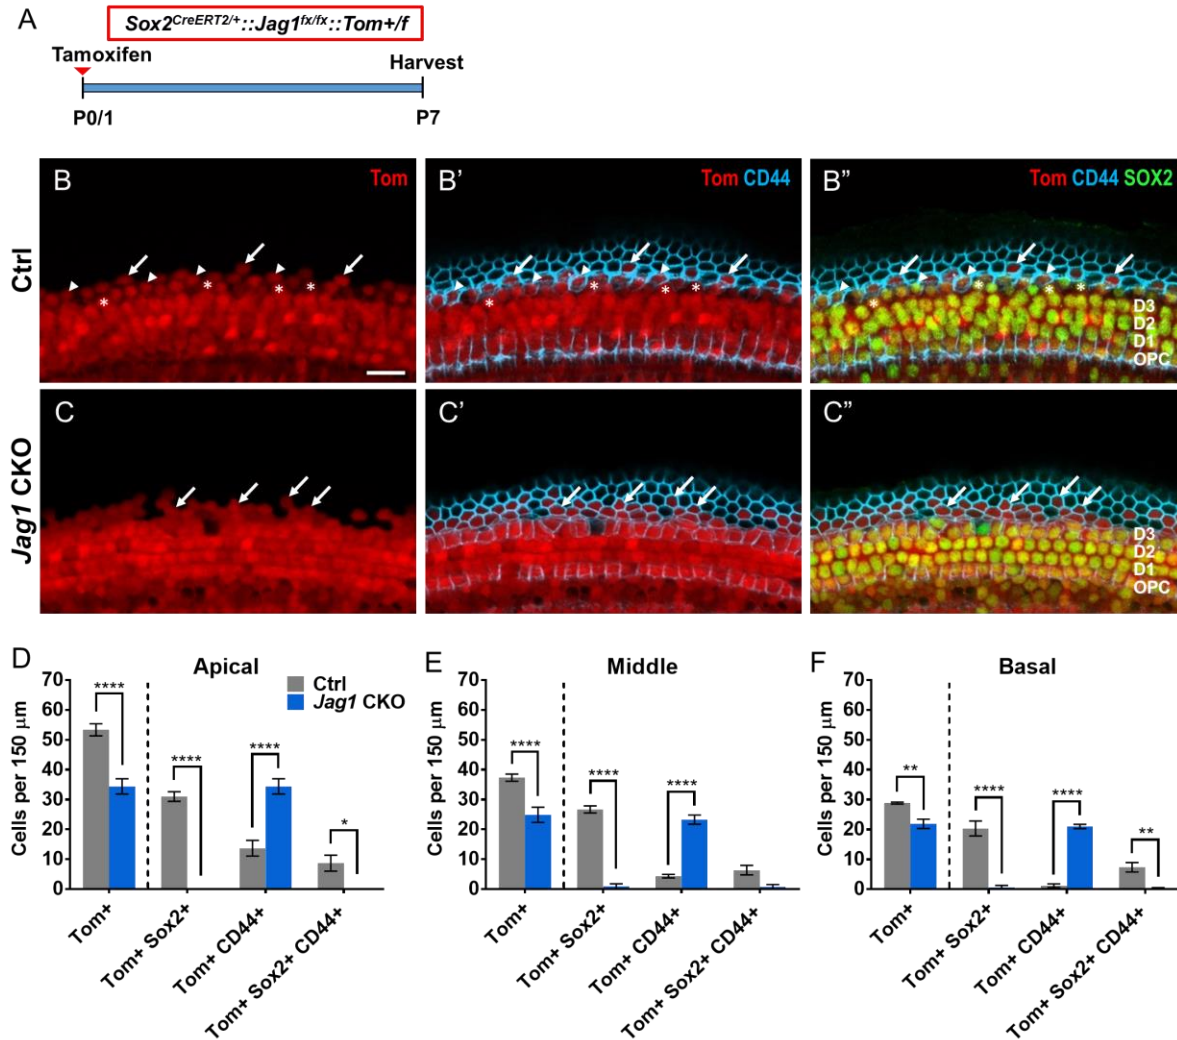

868

869 **Figure 4. Fate-mapping analysis reveals that HeCs die or convert into CCs after**  
 870 **deletion of *Jag1*.** (A) Experimental strategy.  $Sox2^{CreERT2/+}::Jag1^{fx/fx}::Rosa26^{tdTomato/+}$   
 871 (*Jag1* CKO) and  $Sox2^{CreERT2/+}::Rosa26^{tdTomato/+}$  (Ctrl) mice were injected with tamoxifen  
 872 at P0/P1 and cochleae were analyzed at P7. (B-C'') Representative confocal images of  
 873 the apical turn at P7 in Ctrl (B-B'') and *Jag1* CKO (C-C'') mice, showing expression of  
 874 SOX2 (a SC marker, green), CD44 (a CC marker, blue) and tdTomato (Tom, red). Arrows  
 875 indicate Tom<sup>+</sup>, CD44<sup>+</sup> cells, \* indicate Tom<sup>+</sup>, SOX2<sup>+</sup> cells, and arrowheads indicate Tom<sup>+</sup>,  
 876 SOX2<sup>+</sup>, CD44<sup>+</sup> cells. (D-F) Quantification of Tom<sup>+</sup> cells lateral to the 3<sup>rd</sup> row of DCs that

877 also express CD44 and/or SOX2 in the apical (D), middle (E), and basal (F) turns of the  
878 cochleae in Ctrl and *Jag1* CKO mice. Data are expressed as mean  $\pm$  SEM. n=3-4/group;  
879 \*p<0.05, \*\*p<0.01, \*\*\*\*p<0.0001. Scale bar: 20  $\mu$ m.

880

881

882

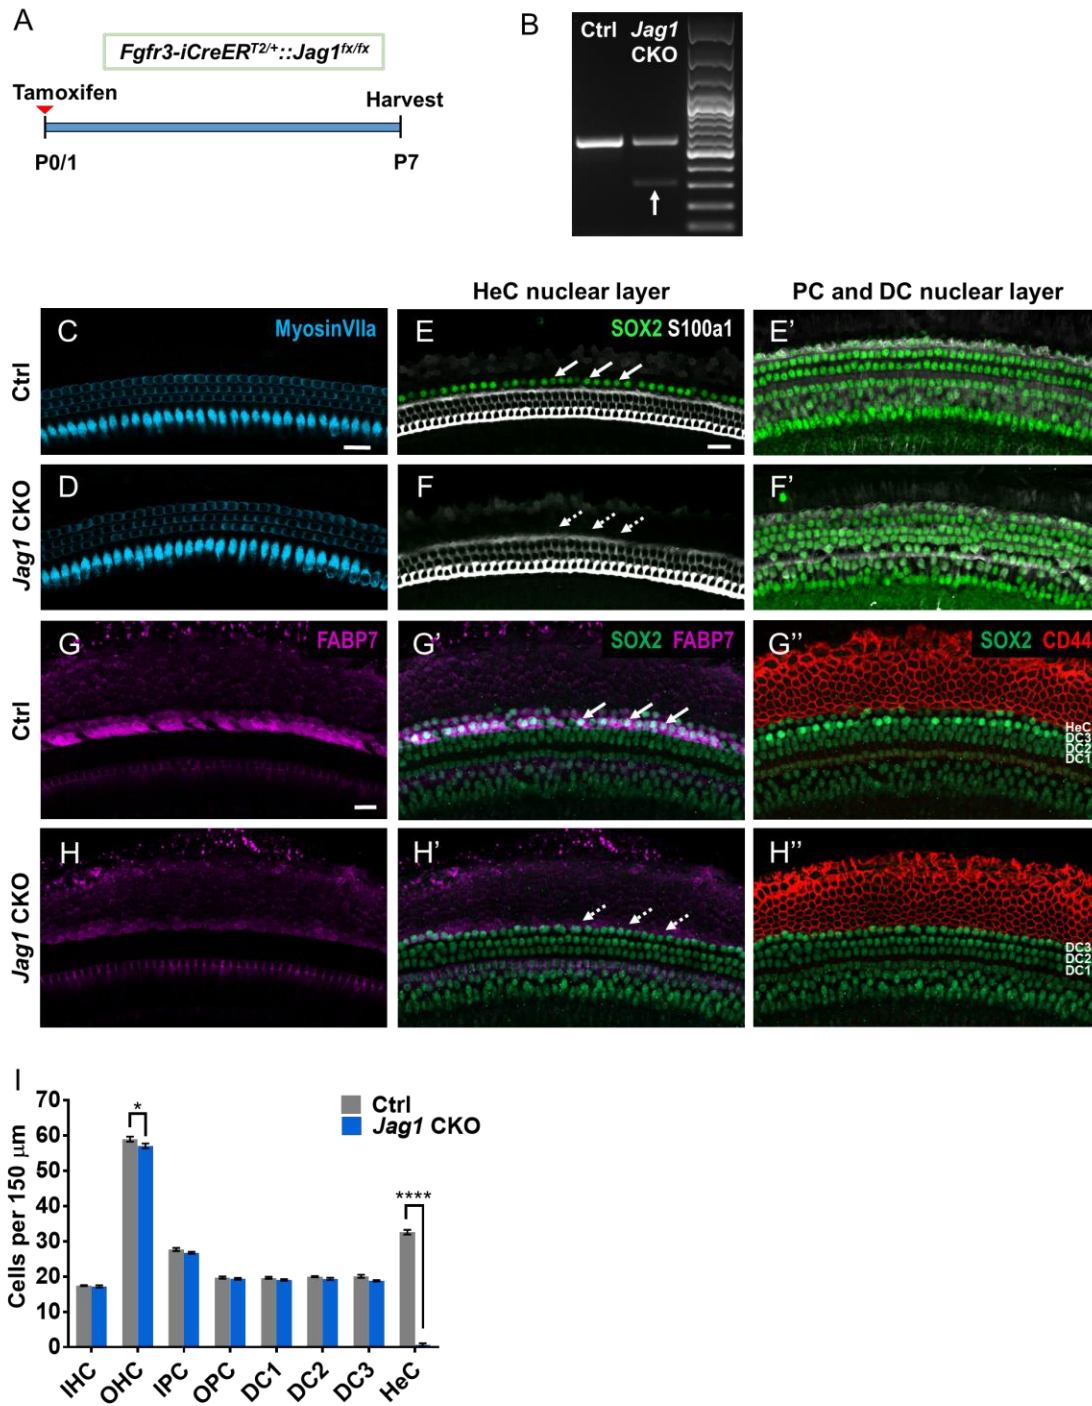

883

884 **Figure 5. Massive loss of HeCs at P7 after neonatal deletion of *Jag1* from PCs and**

885 **DCs. (A)** Experimental strategy. *Fgfr3-iCreER<sup>T2/+</sup>::Jag1<sup>fx/fx</sup>* (*Jag1* CKO) and *Jag1<sup>fx/fx</sup>* (Ctrl)

886 mice were injected with tamoxifen at P0/P1 and cochleae were analyzed at P7. **(B)** RT-

887 PCR results using RNA extracted from P7 Ctrl and *Jag1* CKO whole cochlea. The upper  
888 band (541 bp) indicates the wild-type allele containing exon 4. The lower band (286 bp,  
889 white arrow) confirms deletion of *Jag1* exon 4 in *Jag1* CKO mice. The upper band is still  
890 present in *Jag1* CKO mice since JAG1 is expressed in all SCs and *Fgfr3-iCreER<sup>T2/+</sup>* only  
891 targets PCs and DCs. **(C-D)** Representative confocal slice images of HC, labeled with  
892 myosin VIIa (blue) in P7 Ctrl (C) and *Jag1* CKO (D) mice. **(E-F')** Representative confocal  
893 slice images of SC nuclear layers at the level of HeC nuclei (E, F) and at the level of  
894 PC/DC nuclei (E', F') showing SOX2 (a SC marker, green) and S100a1 (a PC and DC  
895 marker, white) expression in P7 Ctrl (E-E') and *Jag1* CKO (F-F') mice. Arrows indicate  
896 the location of HeCs (E, F). **(G-H'')** Representative confocal slice images of SOX2  
897 (green), FABP7 (a HeC marker, magenta), and CD44 (a CC marker, red) expression in  
898 P7 Ctrl (G-G'') and *Jag1* CKO (H-H'') mice. Arrows indicate the location of HeCs (G', H').  
899 **(I)** Quantification of IHCs, OHCs, and individual SC subtypes (IPCs to HeCs) in Ctrl and  
900 *Jag1* CKO mice. Data are expressed as mean  $\pm$  SEM. n=4/group; \*p<0.05, \*\*\*\*p<0.0001.  
901 Abbreviations: IHC, inner hair cell; OHC, outer hair cell; IPC, inner pillar cell; OPC, outer  
902 pillar cell; DC1, Deiters' cell row 1; DC2, Deiters' cell row 2; DC3, Deiters' cell row 3; HeC,  
903 Hensen's cell. Scale bar: 20  $\mu$ m.

904

905

906



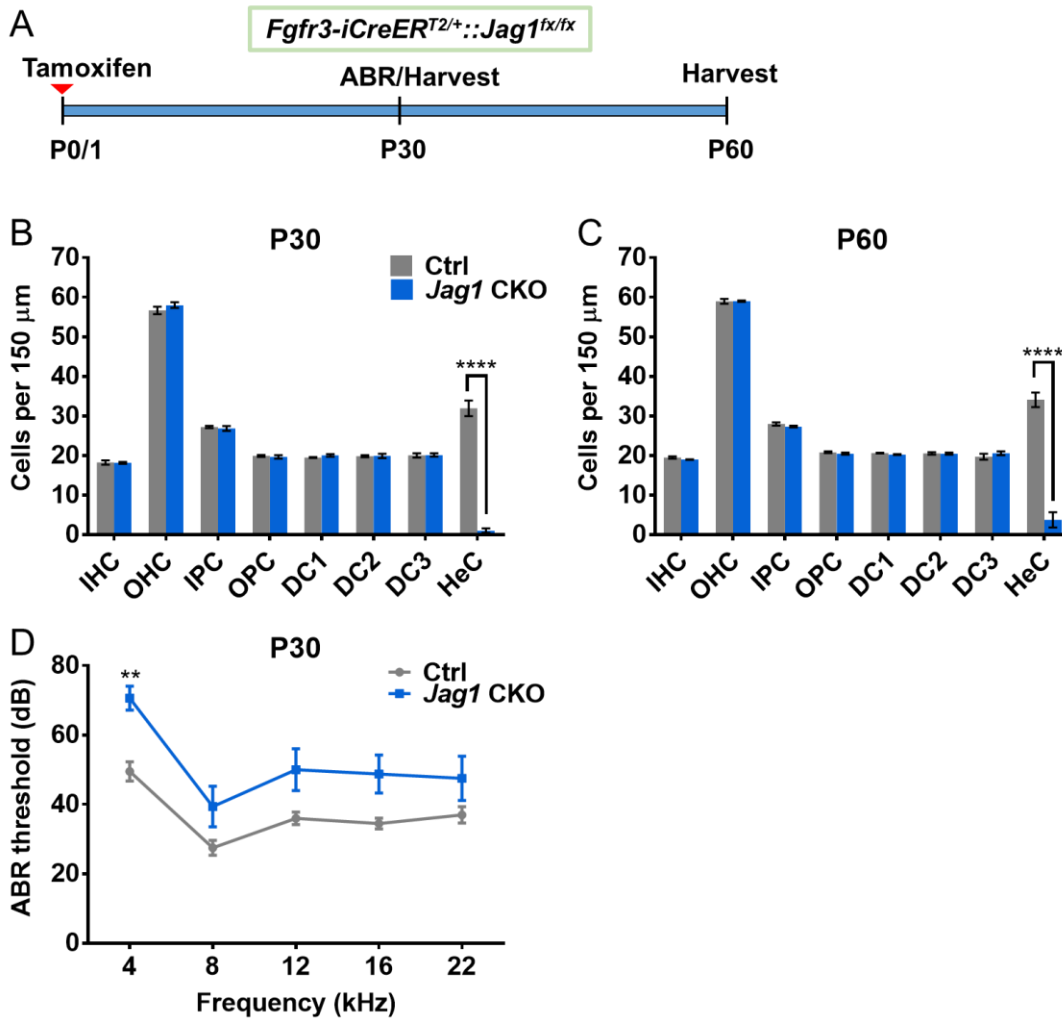

907

908 **Figure 6. Neonatal *Jag1* deletion from PCs and DCs caused hearing deficits in the**  
 909 **low frequency range. (A) Experimental strategy. *Fgfr3-iCreER<sup>T2/+</sup>::Jag1<sup>fx/fx</sup>* (*Jag1* CKO)**  
 910 **and *Jag1<sup>fx/fx</sup>* (Ctrl) mice were injected with tamoxifen at P0/P1, followed by ABR at P30,**  
 911 **and analysis of the cochlea at P30 or P60. (B-C) Quantification of IHCs, OHCs, and**  
 912 **individual SC subtypes (IPCs to HeCs) in Ctrl and *Jag1* CKO mice at P30 (B) and P60**  
 913 **(C). Data are expressed as mean ± SEM. n=4/group; \*\*\*\*p<0.0001. (D) ABR thresholds**  
 914 **of Ctrl and *Jag1* CKO at P30. Data are expressed as mean ± SEM. n=8-10/group;**  
 915 **\*\*p<0.01. Abbreviations: IHC, inner hair cell; OHC, outer hair cell; IPC, inner pillar cell;**

916 OPC, outer pillar cell; DC1, Deiters' cell row 1; DC2, Deiters' cell row 2; DC3, Deiters' cell  
917 row 3; HeC, Hensen's cell.

918

919

920

921

922

923

924

925

926

927

928

929

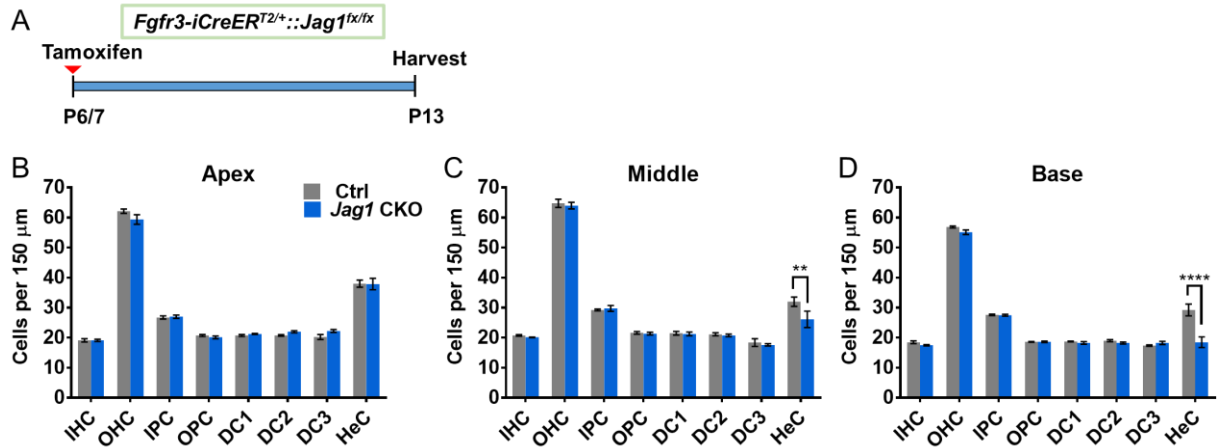

930

931 **Figure 7. Mild loss of HeCs after deletion of *Jag1* from PCs and DCs at one week**

932 **of age. (A)** Experimental strategy. *Fgfr3-iCreER<sup>T2/+</sup>::Jag1<sup>fx/fx</sup>* (*Jag1* CKO) and *Jag1<sup>fx/fx</sup>*

933 (Ctrl) mice were injected with tamoxifen at P6/P7 and cochleae are analyzed at P13. **(B-**

934 **D)** Quantification of IHCs, OHCs, and individual SC subtypes (IPCs to HeCs) in the apical

935 (B), middle (C), and basal (D) turns of the cochleae in Ctrl and *Jag1* CKO mice at P13.

936 Data are expressed as mean  $\pm$  SEM. n=4/group; \*\*p<0.01, \*\*\*\*p<0.0001. Abbreviations:

937 IHC, inner hair cell; OHC, outer hair cell; IPC, inner pillar cell; OPC, outer pillar cell; DC1,

938 Deiters' cell row 1; DC2, Deiters' cell row 2; DC3, Deiters' cell row 3; HeC, Hensen's cell.

939

940

941

942

943

944

945 **SUPPLEMENTAL MATERIAL**

946 **Supplemental Table 1. List of top-ranked down-regulated genes after *Jag1* deletion.**

947 Genes are ranked based on fold change. Shown are genes that are significantly down-  
 948 regulated in *Jag1* CKO samples compared to control ( $p$ -value  $\leq 0.05$ ,  $\log_2$  (FC)  $\leq 3\sigma$ ) after  
 949 tamoxifen and progesterone injection at E14.5. \$ marks SC-specific/enriched genes  
 950 (Maass et al., 2016, Burns et al., 2015) and # marks genes previously found to be  
 951 positively regulated in cochlear epithelial cells by Notch signaling (Maass et al., 2016,  
 952 Campbell et al., 2016). Note that only transcripts with mean  $\log_2$  values of 5.5 or more in  
 953 control samples are listed.

| Gene Symbol            | Accession ID | P-Value | Mean $\log_2$ Ctrl | Mean $\log_2$ Jag1 mut | Fold Change |
|------------------------|--------------|---------|--------------------|------------------------|-------------|
| Npy <sup>\$</sup>      | NM_023456    | 0.0008  | 9.68               | 7.52                   | -4.47       |
| Hbb-bt                 | NM_008220    | 0.0443  | 9.82               | 7.71                   | -4.31       |
| Emcn                   | NM_001163522 | 0.0190  | 6.85               | 4.97                   | -3.67       |
| Hba-a2                 | NM_001083955 | 0.0254  | 9.60               | 7.78                   | -3.53       |
| Prss3                  | NM_011645    | 0.0098  | 6.89               | 5.74                   | -2.21       |
| Jag1 <sup>\$.#</sup>   | NM_013822    | 0.0003  | 10.75              | 9.64                   | -2.17       |
| Hbb-bs                 | NM_001201391 | 0.0297  | 8.13               | 7.02                   | -2.16       |
| Car14 <sup>\$</sup>    | NM_011797    | 0.0088  | 7.23               | 6.17                   | -2.09       |
| Foxf2                  | NM_010225    | 0.0179  | 6.29               | 5.24                   | -2.07       |
| Bgn                    | NM_007542    | 0.0229  | 7.51               | 6.57                   | -1.92       |
| Igfbp3 <sup>\$.#</sup> | NM_008343    | 0.0003  | 9.20               | 8.27                   | -1.90       |
| Ccn3                   | NM_010930    | 0.0347  | 6.51               | 5.65                   | -1.81       |
| Pkd2l1 <sup>\$</sup>   | NM_181422    | 0.0040  | 6.46               | 5.64                   | -1.77       |
| Gm10334                | NM_001103153 | 0.0161  | 7.10               | 6.28                   | -1.76       |
| Agr2                   | NM_011783    | 0.0046  | 7.47               | 6.67                   | -1.73       |
| Rab3b <sup>\$.#</sup>  | NM_023537    | 0.0031  | 7.91               | 7.13                   | -1.73       |
| Ifitm3                 | NM_025378    | 0.0421  | 6.85               | 6.09                   | -1.69       |
| Bambi                  | NM_026505    | 0.0107  | 8.14               | 7.40                   | -1.68       |
| Rgs2                   | NM_009061    | 0.0145  | 7.15               | 6.46                   | -1.61       |
| Fkbp11                 | NM_024169    | 0.0032  | 7.99               | 7.32                   | -1.59       |
| Emilin2 <sup>\$</sup>  | NM_145158    | 0.0199  | 6.87               | 6.20                   | -1.59       |
| St3gal1                | NM_009177    | 0.0064  | 7.90               | 7.29                   | -1.53       |

|                        |              |        |       |       |       |
|------------------------|--------------|--------|-------|-------|-------|
| Agr3 <sup>\$.#</sup>   | NM_207531    | 0.0259 | 7.65  | 7.05  | -1.51 |
| Aldh1a7                | NM_011921    | 0.0015 | 6.30  | 5.71  | -1.51 |
| Ccn4                   | NM_018865    | 0.0062 | 7.72  | 7.13  | -1.51 |
| Lrrtm1 <sup>\$.#</sup> | NM_028880    | 0.0053 | 7.37  | 6.79  | -1.50 |
| Tyrobp                 | NM_011662    | 0.0261 | 6.60  | 6.03  | -1.48 |
| Pthlh                  | NM_008970    | 0.0039 | 7.84  | 7.27  | -1.48 |
| S100a6 <sup>\$</sup>   | NM_011313    | 0.0255 | 6.38  | 5.83  | -1.46 |
| A830018L16Rik          | NM_001160369 | 0.0004 | 6.23  | 5.68  | -1.46 |
| Stox1 <sup>\$</sup>    | NM_001033260 | 0.0013 | 8.50  | 7.95  | -1.46 |
| Hey1 <sup>\$.#</sup>   | NM_010423    | 0.0042 | 11.50 | 10.96 | -1.46 |
| AU021092               | NM_001033220 | 0.0344 | 6.98  | 6.45  | -1.45 |
| Gm5771                 | NM_001038997 | 0.0069 | 6.37  | 5.85  | -1.44 |
| Cavin3 <sup>\$</sup>   | NM_028444    | 0.0052 | 9.73  | 9.22  | -1.42 |
| Trh <sup>\$.#</sup>    | NM_009426    | 0.0005 | 6.10  | 5.62  | -1.39 |
| Cntfr                  | NM_001136056 | 0.0313 | 8.33  | 7.87  | -1.38 |
| Pifo                   | NM_001200028 | 0.0414 | 6.81  | 6.36  | -1.37 |
| Shc3 <sup>\$.#</sup>   | NM_009167    | 0.0209 | 8.18  | 7.73  | -1.37 |
| Plagl1                 | NM_009538    | 0.0075 | 6.73  | 6.28  | -1.37 |
| Antxr1                 | NM_054041    | 0.0068 | 9.29  | 8.84  | -1.37 |
| Jam2                   | NM_023844    | 0.0179 | 5.95  | 5.50  | -1.36 |
| Borcs8                 | NM_001145552 | 0.0320 | 8.11  | 7.66  | -1.36 |
| Foxq1                  | NM_008239    | 0.0251 | 7.53  | 7.09  | -1.44 |
| Timm13 <sup>\$</sup>   | NM_013895    | 0.0221 | 9.84  | 9.40  | -1.35 |
| Cnrip1                 | NM_029861    | 0.0435 | 6.52  | 6.08  | -1.35 |
| Mansc4 <sup>\$</sup>   | NM_001034903 | 0.0027 | 6.03  | 5.60  | -1.34 |
| Prss1                  | NM_053243    | 0.0021 | 6.57  | 6.15  | -1.34 |
| Mir5103                | NR_039562    | 0.0051 | 6.87  | 6.45  | -1.33 |
| Hebp1                  | NM_013546    | 0.0286 | 7.44  | 7.03  | -1.33 |
| Snord123               | NR_028575    | 0.0054 | 7.96  | 7.55  | -1.33 |
| Pipox                  | NM_008952    | 0.0005 | 6.59  | 6.18  | -1.32 |
| Vkorc1                 | NM_178600    | 0.0297 | 11.41 | 11.00 | -1.32 |
| Ddt                    | NM_010027    | 0.0048 | 7.40  | 6.99  | -1.32 |
| Polr2i                 | NM_027259    | 0.0464 | 8.55  | 8.15  | -1.31 |
| Mgst3 <sup>\$</sup>    | NM_025569    | 0.0497 | 10.13 | 9.74  | -1.35 |
| Lsamp <sup>\$.#</sup>  | NM_175548    | 0.0059 | 7.60  | 7.21  | -1.35 |
| Nkain4                 | NM_001141933 | 0.0006 | 7.35  | 6.95  | -1.31 |
| Lgals9                 | NM_001159301 | 0.0083 | 7.05  | 6.66  | -1.31 |
| Mir193b                | NR_030549    | 0.0357 | 6.68  | 6.30  | -1.31 |
| Gstm5                  | NM_010360    | 0.0475 | 10.04 | 9.66  | -1.31 |
| Kcnj4                  | NM_008427    | 0.0433 | 5.78  | 5.40  | -1.30 |
| Ank                    | NM_020332    | 0.0405 | 9.81  | 9.43  | -1.30 |

|                             |                |        |       |       |       |
|-----------------------------|----------------|--------|-------|-------|-------|
| Gm10941                     | NR_026944      | 0.0040 | 7.31  | 6.93  | -1.30 |
| Car10 <sup>\$</sup>         | NM_028296      | 0.0070 | 6.30  | 5.92  | -1.30 |
| Fbn1 <sup>#</sup>           | NM_007993      | 0.0111 | 6.86  | 6.48  | -1.30 |
| Ndufb4b                     | XM_001478443.2 | 0.0145 | 10.53 | 10.15 | -1.30 |
| Snhg18                      | NR_038186      | 0.0032 | 7.92  | 7.55  | -1.30 |
| Mfge8                       | NM_001045489   | 0.0227 | 7.65  | 7.27  | -1.30 |
| Gpx1 <sup>\$.#</sup>        | NM_008160      | 0.0231 | 10.46 | 10.09 | -1.30 |
| Fbln1                       | NM_010180      | 0.0455 | 7.05  | 6.68  | -1.29 |
| Cmtm3                       | NM_024217      | 0.0247 | 8.57  | 8.20  | -1.29 |
| E030030I06Rik <sup>\$</sup> | NM_001254744   | 0.0441 | 6.70  | 6.33  | -1.29 |
| Kit                         | NM_001122733   | 0.0099 | 7.62  | 7.26  | -1.29 |
| Dpysl4 <sup>\$</sup>        | NM_011993      | 0.0251 | 8.76  | 8.40  | -1.29 |
| Lrrc51                      | NM_001162973   | 0.0277 | 8.16  | 7.80  | -1.29 |
| 1810044D09Rik               | NR_038153      | 0.0146 | 5.80  | 5.44  | -1.29 |
| Pold4                       | NM_027196      | 0.0247 | 8.53  | 8.17  | -1.28 |
| Bst2                        | NM_198095      | 0.0227 | 7.02  | 6.66  | -1.28 |
| B3gnt7                      | NM_145222      | 0.0379 | 7.85  | 7.49  | -1.28 |
| Insl6                       | NM_013754      | 0.0063 | 8.16  | 7.80  | -1.28 |
| Timp1                       | NM_001044384   | 0.0154 | 6.34  | 5.99  | -1.28 |
| Sft2d3                      | NM_026006      | 0.0023 | 7.72  | 7.36  | -1.27 |
| Fscn1                       | NM_007984      | 0.0344 | 7.74  | 7.39  | -1.27 |
| Gsto1 <sup>\$</sup>         | NM_010362      | 0.0013 | 6.07  | 5.72  | -1.27 |
| BC035947                    | BC138135       | 0.0087 | 6.73  | 6.39  | -1.27 |
| Etv1 <sup>\$.#</sup>        | NM_001163154   | 0.0114 | 6.98  | 6.63  | -1.27 |
| A330009N23Rik               | NR_045326      | 0.0482 | 6.69  | 6.35  | -1.27 |
| Rufy4 <sup>\$</sup>         | NM_001034060   | 0.0424 | 7.12  | 6.78  | -1.27 |
| Mdm1 <sup>\$</sup>          | NM_001162904   | 0.0105 | 7.85  | 7.51  | -1.26 |
| Nme9                        | NM_001165957   | 0.0007 | 6.05  | 5.71  | -1.26 |
| Fli1                        | NM_008026      | 0.0275 | 6.07  | 5.74  | -1.26 |
| Mtln                        | NR_015476      | 0.0261 | 8.31  | 7.97  | -1.26 |
| Rras <sup>\$.#</sup>        | NM_009101      | 0.0009 | 9.48  | 9.15  | -1.26 |
| Psmg4                       | NM_001101430   | 0.0050 | 9.29  | 8.96  | -1.26 |
| Setmar                      | NM_001276356   | 0.0270 | 6.73  | 6.41  | -1.25 |
| F2r11 <sup>\$.#</sup>       | NM_007974      | 0.0193 | 7.49  | 7.17  | -1.25 |
| Cenpn                       | NM_028131      | 0.0460 | 6.19  | 5.87  | -1.25 |
| Nenf                        | NM_025424      | 0.0449 | 8.88  | 8.56  | -1.25 |
| Ntf3 <sup>\$.#</sup>        | NM_001164034   | 0.0345 | 7.67  | 7.35  | -1.25 |
| Glul                        | NM_008131      | 0.0053 | 8.32  | 8.00  | -1.25 |
| Reps2                       | NM_178256      | 0.0152 | 7.03  | 6.72  | -1.25 |
| Adat2                       | NM_025748      | 0.0030 | 8.61  | 8.29  | -1.25 |
| Lrfn2                       | NM_027452      | 0.0493 | 6.20  | 5.89  | -1.25 |

|                      |              |        |       |       |       |
|----------------------|--------------|--------|-------|-------|-------|
| Ill10ra              | NM_008348    | 0.0090 | 5.74  | 5.42  | -1.24 |
| Mir7020              | NR_105987    | 0.0047 | 6.32  | 6.00  | -1.24 |
| Sept4                | NM_001284392 | 0.0070 | 6.50  | 6.18  | -1.24 |
| Commd4               | NM_025417    | 0.0225 | 9.80  | 9.49  | -1.24 |
| Lsm4                 | NM_015816    | 0.0394 | 9.79  | 9.47  | -1.24 |
| Selenoh              | NM_001033166 | 0.0302 | 8.75  | 8.43  | -1.24 |
| Cxcl12 <sup>#</sup>  | NM_001012477 | 0.0340 | 6.31  | 6.00  | -1.24 |
| Slc2a3               | NM_011401    | 0.0071 | 5.81  | 5.50  | -1.24 |
| Atp5g1               | NM_001161419 | 0.0215 | 8.58  | 8.27  | -1.24 |
| Zmat5                | NM_026015    | 0.0485 | 8.33  | 8.02  | -1.24 |
| Adgre5               | NM_001163029 | 0.0367 | 6.45  | 6.14  | -1.25 |
| Sp7                  | NM_130458    | 0.0490 | 5.97  | 5.66  | -1.24 |
| 1700003D09Rik        | NR_045477    | 0.0252 | 6.06  | 5.75  | -1.24 |
| Wdr83os              | NM_001001493 | 0.0246 | 9.24  | 8.94  | -1.24 |
| Mettl26              | NM_026686    | 0.0439 | 9.53  | 9.23  | -1.23 |
| Nit2                 | NM_023175    | 0.0485 | 7.68  | 7.38  | -1.23 |
| Ndufa3               | NM_025348    | 0.0345 | 9.34  | 9.03  | -1.23 |
| Ppih                 | NM_001110129 | 0.0033 | 7.78  | 7.48  | -1.23 |
| Rps15                | NM_009091    | 0.0424 | 11.11 | 10.81 | -1.23 |
| 5730408K05Rik        | NR_027866    | 0.0183 | 6.54  | 6.25  | -1.23 |
| Ndufaf3              | NM_023247    | 0.0105 | 7.31  | 7.01  | -1.23 |
| Scarna6              | NR_028519    | 0.0483 | 6.31  | 6.02  | -1.23 |
| Gm9258               | XR_105855.1  | 0.0305 | 7.00  | 6.70  | -1.23 |
| Ppp1r1a              | NM_021391    | 0.0225 | 7.95  | 7.65  | -1.23 |
| Lsm7                 | NM_025349    | 0.0324 | 8.80  | 8.51  | -1.22 |
| Dpm2                 | NM_010073    | 0.0099 | 7.75  | 7.46  | -1.22 |
| Rtl8c                | NM_028375    | 0.0065 | 7.17  | 6.88  | -1.22 |
| Ciao2b               | NM_026753    | 0.0408 | 8.96  | 8.67  | -1.22 |
| Muc1 <sup>\$.#</sup> | NM_013605    | 0.0078 | 6.94  | 6.65  | -1.22 |
| Smim3 <sup>\$</sup>  | NM_134133    | 0.0270 | 7.30  | 7.01  | -1.22 |
| Nop10                | NM_025403    | 0.0196 | 7.30  | 7.02  | -1.22 |
| Mrpl36 <sup>\$</sup> | NM_053163    | 0.0171 | 7.69  | 7.41  | -1.22 |
| Ndufb4               | NM_026610    | 0.0260 | 7.66  | 7.37  | -1.22 |
| Nkapl                | NM_025719    | 0.0179 | 6.06  | 5.78  | -1.21 |
| Pard6g               | NM_053117    | 0.0383 | 7.79  | 7.51  | -1.21 |
| Rps26                | NM_013765    | 0.0416 | 12.42 | 12.15 | -1.21 |

954

955

956 **Supplemental Table 2. List of top-ranked up-regulated genes after *Jag1* deletion.**

957 Genes are ranked based on fold change (FC). Shown are genes that are significantly up-  
 958 regulated in *Jag1* CKO samples compared to control ( $p$ -value  $\leq 0.05$ ,  $\log_2(\text{FC}) \geq 3\sigma$ ) after  
 959 tamoxifen and progesterone injection at E14.5. \$ marks SC-specific/enriched genes  
 960 (Maass et al., 2016, Burns et al., 2015) and # marks genes previously found to be  
 961 negatively regulated in cochlear epithelial cells by Notch signaling (Maass et al., 2016,  
 962 Campbell et al., 2016). Note that only transcripts with mean  $\log_2$  values in *Jag1* mutant  
 963 samples of 5.5 or more are listed.

| Gene Symbol            | Accession ID | P-Value | Mean Log2 Ctrl | Mean Log2 Jag1 mut | Fold Change |
|------------------------|--------------|---------|----------------|--------------------|-------------|
| Brinp1                 | NM_019967    | 0.0032  | 7.14           | 7.97               | 1.78        |
| Tmem132d               | NM_172885    | 0.0111  | 7.67           | 8.28               | 1.53        |
| Calb2                  | NM_007586    | 0.0164  | 7.09           | 7.70               | 1.53        |
| Crhbp                  | NM_198408    | 0.0034  | 5.55           | 6.14               | 1.51        |
| Kcne1                  | NM_008424    | 0.0183  | 5.32           | 5.87               | 1.46        |
| Tmem117                | NM_178789    | 0.0377  | 8.44           | 8.97               | 1.44        |
| Plxna4                 | NM_175750    | 0.0529  | 8.643          | 9.12               | 1.40        |
| Kdm6a                  | NM_009483    | 0.0054  | 7.96           | 8.44               | 1.39        |
| Calb1                  | NM_009788    | 0.0168  | 9.43           | 9.89               | 1.38        |
| Rnd3 <sup>\$</sup>     | NM_028810    | 0.0291  | 7.80           | 8.26               | 1.37        |
| Cdkl1                  | NM_183294    | 0.0035  | 5.25           | 5.70               | 1.36        |
| Eif2s3x                | NM_012010    | 0.0215  | 8.03           | 8.47               | 1.35        |
| Asic3                  | NM_183000    | 0.0489  | 8.91           | 9.34               | 1.35        |
| Dennd4a                | NM_001162917 | 0.0525  | 8.27           | 8.69               | 1.34        |
| Vmn1r90                | NM_001244031 | 0.0295  | 5.57           | 6.00               | 1.34        |
| Dpysl2 <sup>\$.#</sup> | NM_009955    | 0.0277  | 10.75          | 11.17              | 1.34        |
| B4galnt3 <sup>\$</sup> | NM_198884    | 0.0372  | 9.88           | 10.30              | 1.34        |
| Fras1                  | NM_175473    | 0.0303  | 9.89           | 10.30              | 1.33        |
| Meltf                  | NM_013900    | 0.0369  | 8.54           | 8.94               | 1.32        |
| Fam184b                | NM_021416    | 0.0257  | 8.34           | 8.73               | 1.31        |
| Olf1r1383              | NM_207574    | 0.0012  | 5.62           | 6.01               | 1.31        |
| Phactr1                | NM_001005740 | 0.0401  | 6.12           | 6.50               | 1.31        |
| ligp1                  | NM_001146275 | 0.0056  | 6.06           | 6.44               | 1.31        |
| Ano1 <sup>\$</sup>     | NM_001242349 | 0.0403  | 8.66           | 9.04               | 1.30        |



|                     |              |        |       |       |      |
|---------------------|--------------|--------|-------|-------|------|
| Elovl7              | NM_029001    | 0.0059 | 5.62  | 5.99  | 1.29 |
| Twf1                | NM_008971    | 0.0066 | 10.13 | 10.48 | 1.28 |
| Brip1 <sup>§</sup>  | NM_178309    | 0.0384 | 5.98  | 6.32  | 1.27 |
| Kdsr <sup>§</sup>   | NM_027534    | 0.0486 | 9.59  | 9.93  | 1.26 |
| Tex19.2             | NM_027622    | 0.0274 | 5.41  | 5.75  | 1.26 |
| Cpa6 <sup>§,#</sup> | NM_001289497 | 0.0255 | 6.86  | 7.18  | 1.26 |
| Daam1               | NM_001286452 | 0.0211 | 8.42  | 8.75  | 1.25 |
| Vps4b               | NM_009190    | 0.0426 | 8.43  | 8.75  | 1.25 |
| Ctrcos              | NR_040641    | 0.0062 | 6.69  | 7.01  | 1.25 |
| Ptgir <sup>§</sup>  | NM_008967    | 0.0437 | 6.01  | 6.33  | 1.25 |
| Cdh4 <sup>#</sup>   | NM_009867    | 0.0195 | 10.22 | 10.55 | 1.25 |
| Atp1b1              | NM_009721    | 0.0334 | 10.58 | 10.90 | 1.25 |
| Kdm5c               | NM_013668    | 0.0251 | 8.44  | 8.75  | 1.24 |
| Tnnc2               | NM_009394    | 0.0510 | 6.84  | 7.14  | 1.23 |
| Cdh11               | NM_009866    | 0.0329 | 10.58 | 10.87 | 1.22 |
| Fut2                | NM_001271993 | 0.0535 | 6.23  | 6.52  | 1.22 |
| Dpyd                | NM_170778    | 0.0480 | 7.86  | 8.15  | 1.22 |
| Mertk               | NM_008587    | 0.0368 | 8.06  | 8.34  | 1.22 |
| Kcnq5               | NM_001160139 | 0.0242 | 5.98  | 6.26  | 1.22 |
| Rxrg                | NM_001159731 | 0.0480 | 8.23  | 8.50  | 1.21 |
| Pou3f2              | NM_008899    | 0.0078 | 5.38  | 5.65  | 1.21 |
| Robo2 <sup>#</sup>  | NM_175549    | 0.0487 | 8.71  | 8.98  | 1.21 |
| Peg3                | NM_008817    | 0.0065 | 8.65  | 8.91  | 1.20 |
| Epyc                | NM_007884    | 0.0194 | 12.88 | 13.14 | 1.20 |
| Corin <sup>§</sup>  | NM_001122756 | 0.0286 | 6.31  | 6.57  | 1.20 |
| Ppp2r3a             | NM_001161362 | 0.0153 | 6.55  | 6.81  | 1.20 |
| Tmem266             | NM_172923    | 0.0345 | 6.78  | 7.04  | 1.19 |
| Sft2d2              | NM_145512    | 0.0122 | 7.45  | 7.70  | 1.19 |
| Mir181c             | NR_029821    | 0.0198 | 7.77  | 8.02  | 1.19 |
| Adamts17            | NM_001033877 | 0.0256 | 9.11  | 9.36  | 1.19 |
| Serpinb5            | NM_009257    | 0.0422 | 7.02  | 7.27  | 1.19 |

964

965

966

967
